# Supplementary material
Source: PubMed Central journal article supplement (PMC8237201)

## Supplement: Use of non-steroidal anti-inflammatory drugs and risk of death from COVID-19: an OpenSAFELY cohort analysis based on two cohorts

### Contents

|                                                                                                                                                                            |    |
|----------------------------------------------------------------------------------------------------------------------------------------------------------------------------|----|
| Figure S1. Illustration of the follow up.....                                                                                                                              | 3  |
| Figure S2. Directed Acyclic Graph for the association between NSAIDs and COVID-19 related deaths. ....                                                                     | 4  |
| Figure S3. Flowchart of inclusion in both cohorts.....                                                                                                                     | 5  |
| Figure S4. Time to COVID-19 related death by treatment group in Kaplan-Meier plot – General population.....                                                                | 6  |
| Figure S5. Cumulative mortality by exposure group, standardized to the covariate distribution of the exposure group - General population.....                              | 7  |
| Table S1. Association between any oral NSAIDs and COVID-19 death.....                                                                                                      | 8  |
| Table S2. Association between any oral NSAIDs and COVID-19 death, Age interaction ....                                                                                     | 9  |
| Table S3. Testing the PH assumption for COVID-19 Death in the main analysis.....                                                                                           | 11 |
| Figure S6. Schoenfeld residuals – General population.....                                                                                                                  | 12 |
| Figure S7. Time to COVID-19 related death by treatment group in Kaplan-Meier plot – osteoarthritis/ rheumatoid arthritis population.....                                   | 13 |
| Figure S8. Cumulative mortality by exposure group, standardized to the covariate distribution of the exposure group - osteoarthritis/ rheumatoid arthritis population..... | 14 |
| Table S4. 1 by 1 comorbidity adjustments (after age/sex adjustments and stratified by regions) – osteoarthritis/ rheumatoid arthritis population.....                      | 15 |
| Figure S9. Schoenfeld residuals – osteoarthritis/ rheumatoid arthritis population.....                                                                                     | 18 |
| Table S5. Descriptive Characteristics in people prescribed NSAIDs in the past 3 years, stratified by naproxen dose.....                                                    | 19 |
| Table S6. Descriptive Characteristics in people with osteoarthritis/ rheumatoid arthritis, stratified by naproxen dose.....                                                | 21 |
| Table S7. Descriptive Characteristics in people prescribed NSAIDs in the past 3 years, stratified by COX-2 specific NSAIDs.....                                            | 23 |
| Table S8. Descriptive Characteristics in people with osteoarthritis/ rheumatoid arthritis, stratified by COX-2 specific NSAIDs.....                                        | 25 |
| Table S9. Descriptive Characteristics in people prescribed NSAIDs in the past 3 years, stratified by ibuprofen.....                                                        | 27 |
| Table S10. Descriptive Characteristics in people with osteoarthritis/ rheumatoid arthritis, stratified by ibuprofen.....                                                   | 29 |
| Figure S10. Time to COVID-19 related death by types of NSAIDs in Kaplan-Meier plot – General population.....                                                               | 31 |

|                                                                                                                                                                              |    |
|------------------------------------------------------------------------------------------------------------------------------------------------------------------------------|----|
| Figure S11. Time to COVID-19 related death by types of NSAIDs in Kaplan-Meier plot – osteoarthritis/ rheumatoid arthritis population.....                                    | 32 |
| Table S11. Association between low dose naproxen, high dose naproxen and other NSAIDs and COVID-19 compared with non-use of NSAIDs .....                                     | 33 |
| Table S12. Association between COX-2 specific NSAIDs, non-specific NSAIDs with COVID-19 death compared with non-use of NSAIDs .....                                          | 34 |
| Table S13. Association between ibuprofen, other NSAIDs with COVID-19 death compared with non-use of NSAIDs.....                                                              | 35 |
| Table S14. Sensitivity analysis that excluding people ever prescribed aspirin .....                                                                                          | 36 |
| Table S15. <i>Post-hoc</i> analysis that using Directed Acyclic Graph approach to select covariates .....                                                                    | 37 |
| Table S16. Sensitivity analysis that additionally adjusting for ethnicity in the Multivariable-adjusted models.....                                                          | 38 |
| Table S17. Sensitivity analysis that additionally adjusted for GP consultation and A&E attendance in the Multivariable-adjusted models .....                                 | 39 |
| Table S18. Sensitivity analysis that separating HbA1c no measures category from uncontrolled diabetes category in the Multivariable-adjusted models .....                    | 40 |
| Table S19. Sensitivity analysis that using 2 months to be the timeframe to identify exposure status .....                                                                    | 41 |
| Table S20. Sensitivity analysis that removing indomethacin from exposure of interest.....                                                                                    | 42 |
| Table S21. Sensitivity analysis that not censoring people at NSAID prescription after study start date in the non-use of NSAID group as an intention-to-treat analysis ..... | 43 |
| Figure S12. E-value for the upper 95% CI and point estimate in people with rheumatoid arthritis/ osteoarthritis .....                                                        | 44 |

Figure S1. Illustration of the follow up

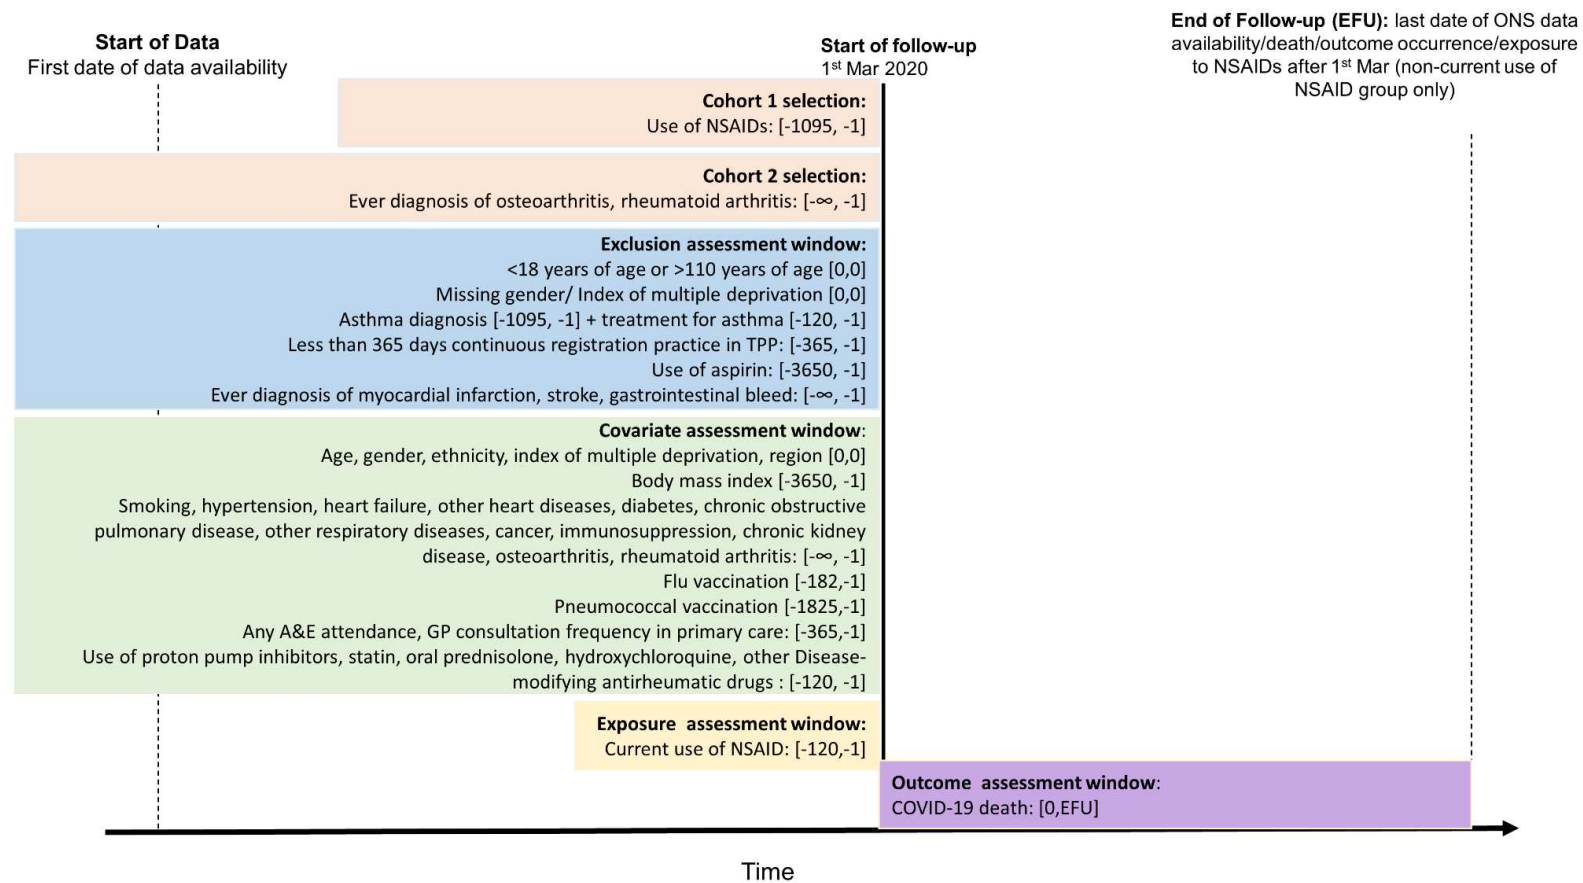

Figure S2. Directed Acyclic Graph for the association between NSAIDs and COVID-19 related deaths.

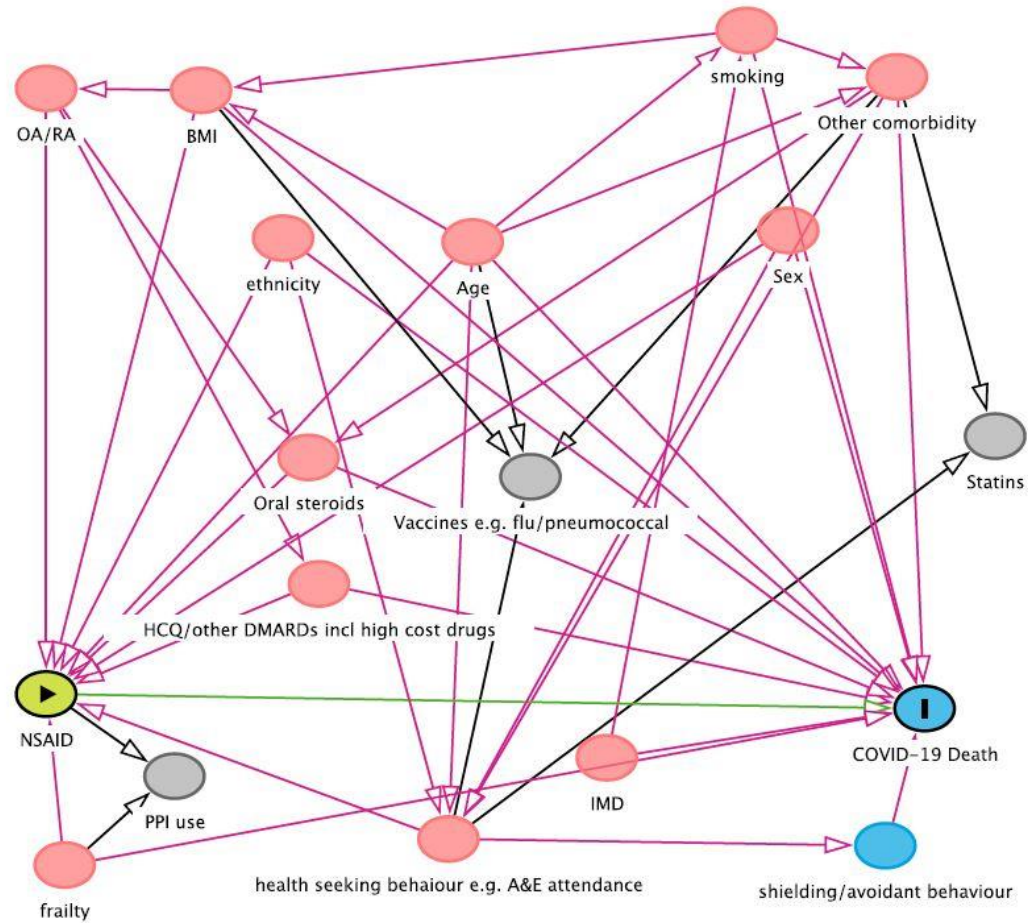

Figure S3. Flowchart of inclusion in both cohorts

Figure 1a. Flowchart for inclusion in people receiving NSAIDs between 1<sup>st</sup> Mar 2017 and 29<sup>th</sup> Feb 2020.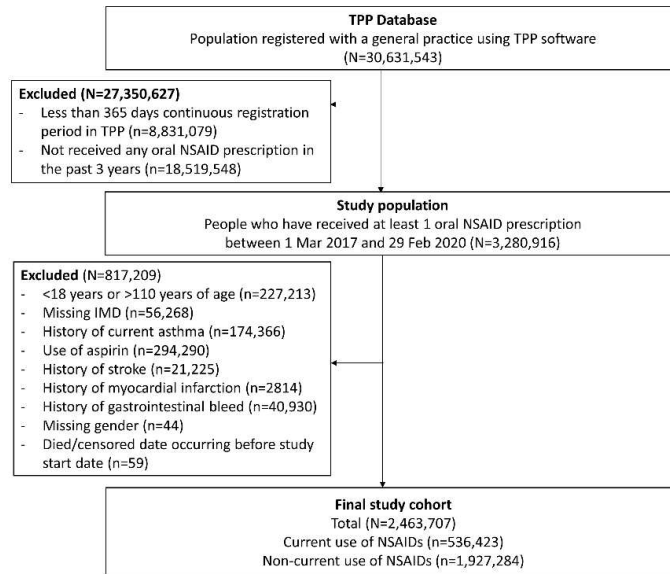

Figure 1b. Flowchart for inclusion in people with osteoarthritis or rheumatoid arthritis.

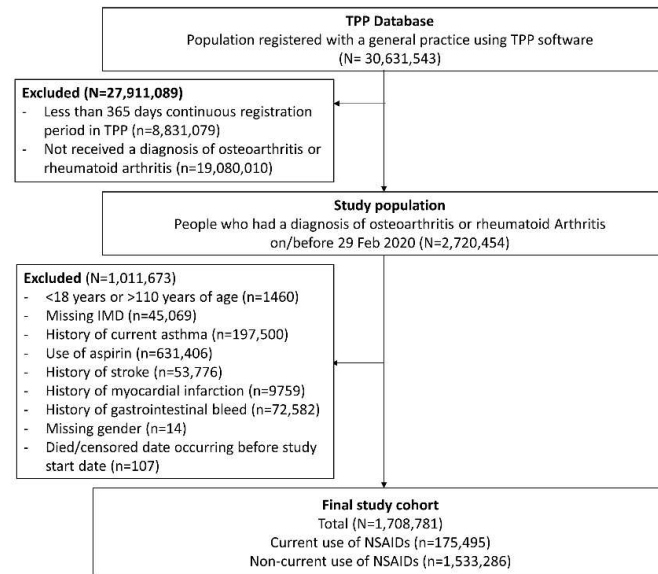

**Figure S4. Time to COVID-19 related death by treatment group in Kaplan-Meier plot – General population**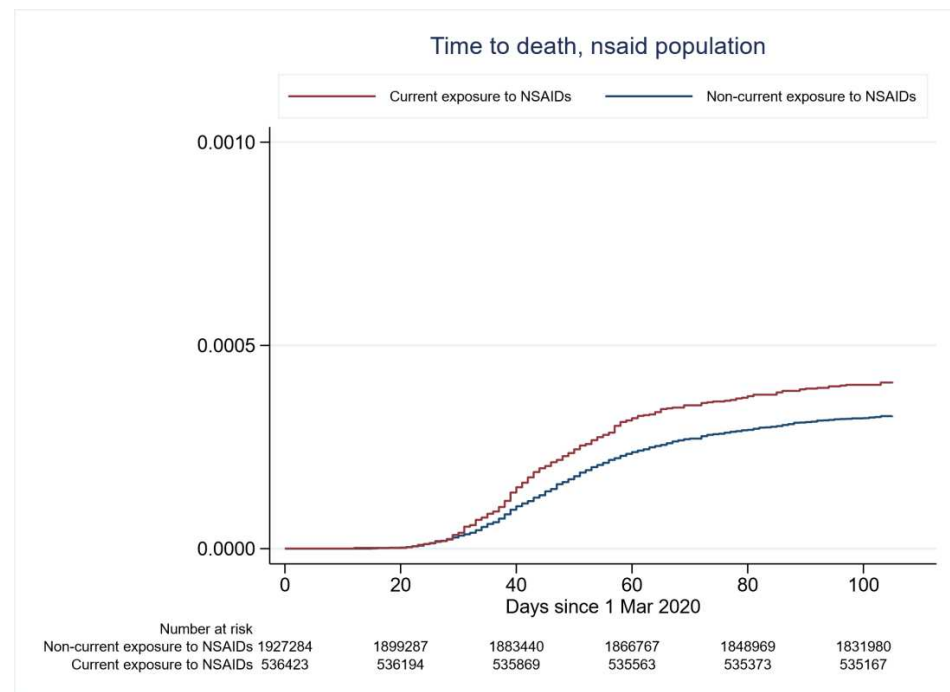

**Figure S5. Cumulative mortality by exposure group, standardized to the covariate distribution of the exposure group - General population**

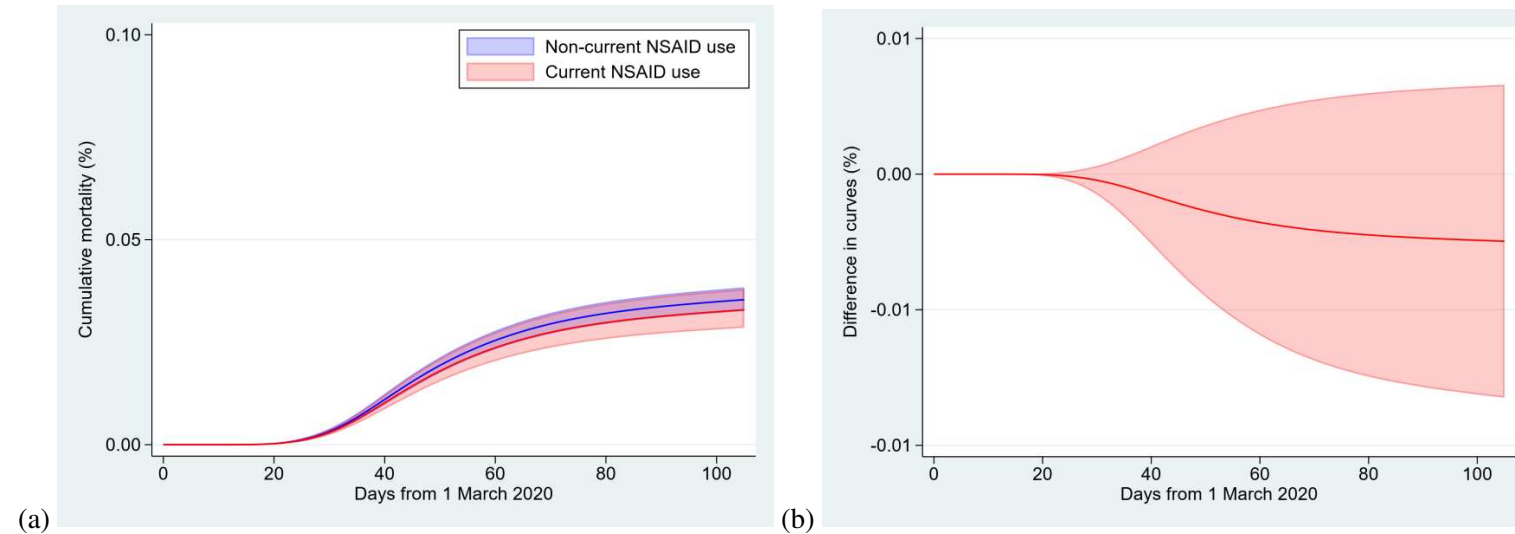

Figure S5 (a) presents cumulative mortality predicted from a Royston-Parmar model including all covariates from the Multivariable-adjusted Cox model, with the baseline hazard parametrized as a 3-degrees-of-freedom cubic spline; predictions standardized to the covariate distribution of the exposure group. Figure S5 (b) presents difference between two curves in Figure S4 (a).

**Table S1. Association between any oral NSAIDs and COVID-19 death**

|                                                                          | Number of deaths | Total person-week | Rate per 1000 | Unadjusted |             | Age/Sex Adjusted |             | Multivariable-adjusted <sup>a</sup> |             |
|--------------------------------------------------------------------------|------------------|-------------------|---------------|------------|-------------|------------------|-------------|-------------------------------------|-------------|
|                                                                          |                  |                   |               | HR         | 95% CI      | HR               | 95% CI      | HR                                  | 95% CI      |
| <b>Study population 1: General population (NSAIDs prescribed cohort)</b> |                  |                   |               |            |             |                  |             |                                     |             |
| Non-use of NSAID                                                         | 612              | 28,098,800        | 0.02          | 1.00 (ref) |             | 1.00 (ref)       |             | 1.00 (ref)                          |             |
| Current use of NSAIDs                                                    | 220              | 8,035,882         | 0.03          | 1.26       | 1.08 - 1.47 | 1.09             | 0.94 - 1.28 | 0.96                                | 0.80 - 1.14 |
| <b>Study population 2: Rheumatoid arthritis/ osteoarthritis cohort</b>   |                  |                   |               |            |             |                  |             |                                     |             |
| Non-use of NSAID                                                         | 2450             | 22,598,389        | 0.11          | 1.00 (ref) |             | 1.00 (ref)       |             | 1.00 (ref)                          |             |
| Current use of NSAIDs                                                    | 123              | 2,627,417         | 0.05          | 0.43       | 0.36 - 0.52 | 0.83             | 0.69 - 1.00 | 0.78                                | 0.64 - 0.94 |

<sup>a</sup>Adjusted for age, sex, obesity, smoking status, deprivation, chronic kidney disease, hypertension, heart failure, other heart diseases, diabetes severity, chronic obstructive pulmonary disease, other respiratory diseases, immunosuppression, cancer, rheumatoid arthritis (study population 1), osteoarthritis (study population 1), rheumatoid arthritis/osteoarthritis/both (study population 2), statins, proton pump inhibitors, oral prednisolone, hydroxychloroquine, other DMARDs, flu vaccine and pneumococcal vaccine.



**Table S2. Association between any oral NSAIDs and COVID-19 death, Age interaction**

|                                                                          | Number of deaths             | Total person-week | Rate per 1000 | Unadjusted |            |                 | Age/Sex Adjusted |            |                 | Multivariable-adjusted <sup>a</sup> |            |                 |
|--------------------------------------------------------------------------|------------------------------|-------------------|---------------|------------|------------|-----------------|------------------|------------|-----------------|-------------------------------------|------------|-----------------|
|                                                                          |                              |                   |               | HR         | 95% CI     | p(inter-action) | HR               | 95% CI     | p(inter-action) | HR                                  | 95% CI     | p(inter-action) |
| <b>Study population 1: General population (NSAIDs prescribed cohort)</b> |                              |                   |               |            |            |                 |                  |            |                 |                                     |            |                 |
| <b>Age group</b>                                                         |                              |                   |               |            |            |                 |                  |            |                 |                                     |            |                 |
| <70                                                                      |                              |                   |               |            |            | <0.01           |                  |            | 0.10            |                                     |            | 0.29            |
|                                                                          | <b>Non-use of NSAID</b>      | 225               | 24,847,189    | 0.01       | 1.00 (ref) |                 |                  | 1.00 (ref) |                 |                                     | 1.00 (ref) |                 |
|                                                                          | <b>Current use of NSAIDs</b> | 98                | 6,867,811     | 0.01       | 1.58       | 1.24 - 2.00     |                  | 1.28       | 1.01 - 1.63     |                                     | 1.06       | 0.82 - 1.36     |
| ≥70                                                                      |                              |                   |               |            |            |                 |                  |            |                 |                                     |            |                 |
|                                                                          | <b>Non-use of NSAID</b>      | 387               | 3,251,613     | 0.12       | 1.00 (ref) |                 |                  | 1.00 (ref) |                 |                                     | 1.00 (ref) |                 |
|                                                                          | <b>Current use of NSAIDs</b> | 122               | 1,168,071     | 0.1        | 0.88       | 0.72 - 1.08     |                  | 0.98       | 0.80 - 1.21     |                                     | 0.89       | 0.72 - 1.11     |
| <b>Study population 2: Rheumatoid arthritis/ osteoarthritis cohort</b>   |                              |                   |               |            |            |                 |                  |            |                 |                                     |            |                 |
| <b>Age group</b>                                                         |                              |                   |               |            |            |                 |                  |            |                 |                                     |            |                 |
| <70                                                                      |                              |                   |               |            |            | <0.01           |                  |            | 0.03            |                                     |            | 0.16            |
|                                                                          | <b>Non-use of NSAID</b>      | 256               | 12,357,511    | 0.02       | 1.00 (ref) |                 |                  | 1.00 (ref) |                 |                                     | 1.00 (ref) |                 |
|                                                                          | <b>Current use of NSAIDs</b> | 41                | 1,837,108     | 0.02       | 1.08       | 0.77 - 1.50     |                  | 1.15       | 0.82 - 1.59     |                                     | 0.95       | 0.68 - 1.33     |
| ≥70                                                                      |                              |                   |               |            |            |                 |                  |            |                 |                                     |            |                 |
|                                                                          | <b>Non-use of NSAID</b>      | 2194              | 10,240,877    | 0.21       | 1.00 (ref) |                 |                  | 1.00 (ref) |                 |                                     | 1.00 (ref) |                 |
|                                                                          | <b>Current use of NSAIDs</b> | 82                | 790,308       | 0.10       | 0.48       | 0.39 - 0.60     |                  | 0.74       | 0.59 - 0.92     |                                     | 0.71       | 0.57 - 0.90     |

<sup>a</sup>Adjusted for age, sex, obesity, smoking status, deprivation, chronic kidney disease, hypertension, heart failure, other heart diseases, diabetes severity, chronic obstructive pulmonary disease, other respiratory diseases, immunosuppression, cancer, rheumatoid arthritis (study population 1), osteoarthritis (study population 2)

population 1), rheumatoid arthritis/osteoarthritis/both (study population 2), statins, proton pump inhibitors, oral prednisolone, hydroxychloroquine, other DMARDS, flu vaccine and pneumococcal vaccine.

**Table S3. Testing the PH assumption for COVID-19 Death in the main analysis**

|                                                                          | <b>Unadjusted</b> | <b>Age/Sex Adjusted</b> | <b>Multivariable-adjusted<sup>a</sup></b> |
|--------------------------------------------------------------------------|-------------------|-------------------------|-------------------------------------------|
|                                                                          | <b>p-value</b>    | <b>p-value</b>          | <b>p-value</b>                            |
| <b>Study population 1: General population (NSAIDs prescribed cohort)</b> |                   |                         |                                           |
| Treatment Exposure                                                       | 0.18              | 0.25                    | 0.20                                      |
| <b>Study population 2: Rheumatoid arthritis/ osteoarthritis cohort</b>   |                   |                         |                                           |
| Treatment Exposure                                                       | 0.15              | 0.72                    | 0.87                                      |

<sup>a</sup>Adjusted for age, sex, obesity, smoking status, deprivation, chronic kidney disease, hypertension, heart failure, other heart diseases, diabetes severity, chronic obstructive pulmonary disease, other respiratory diseases, immunosuppression, cancer, rheumatoid arthritis (study population 1), osteoarthritis (study population 1), rheumatoid arthritis/osteoarthritis/both (study population 2), statins, proton pump inhibitors, oral prednisolone, hydroxychloroquine, other DMARDS, flu vaccine and pneumococcal vaccine.

**Figure S6. Schoenfeld residuals – General population**

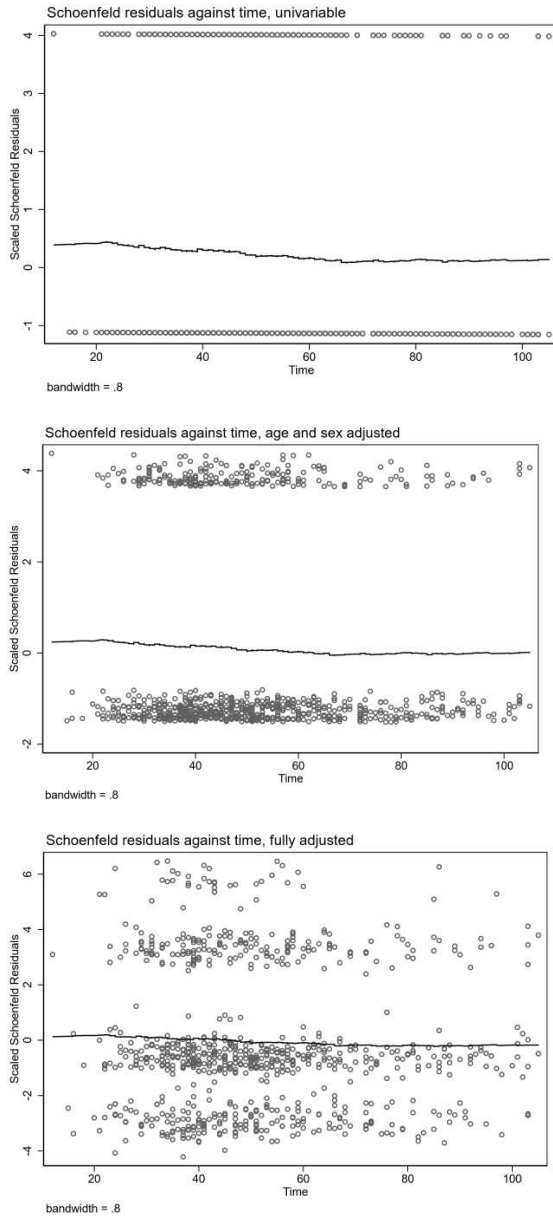

**Figure S7. Time to COVID-19 related death by treatment group in Kaplan-Meier plot – osteoarthritis/ rheumatoid arthritis population**

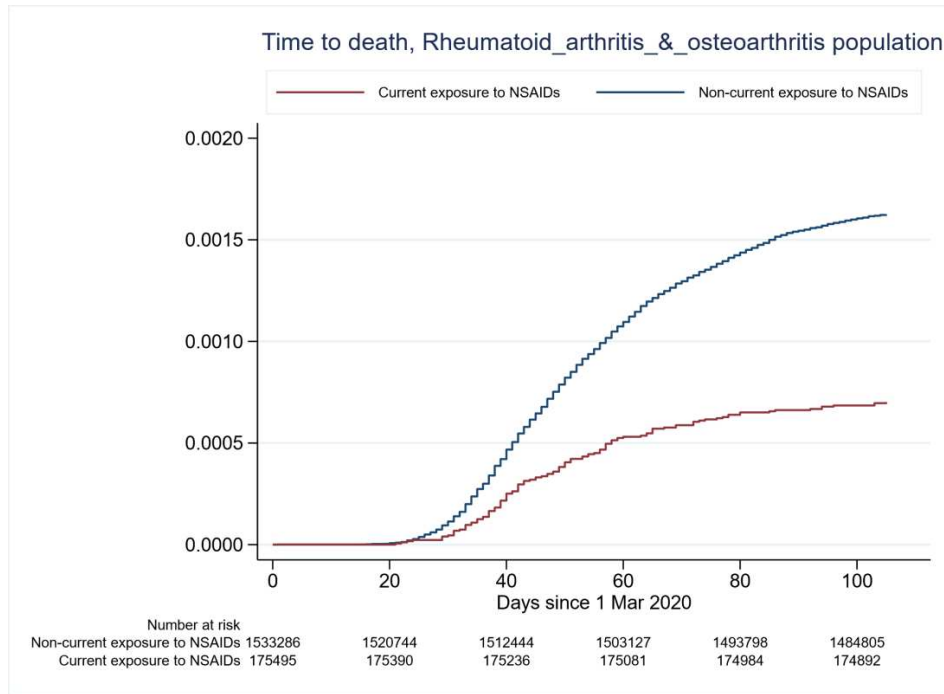

**Figure S8. Cumulative mortality by exposure group, standardized to the covariate distribution of the exposure group - osteoarthritis/ rheumatoid arthritis population**

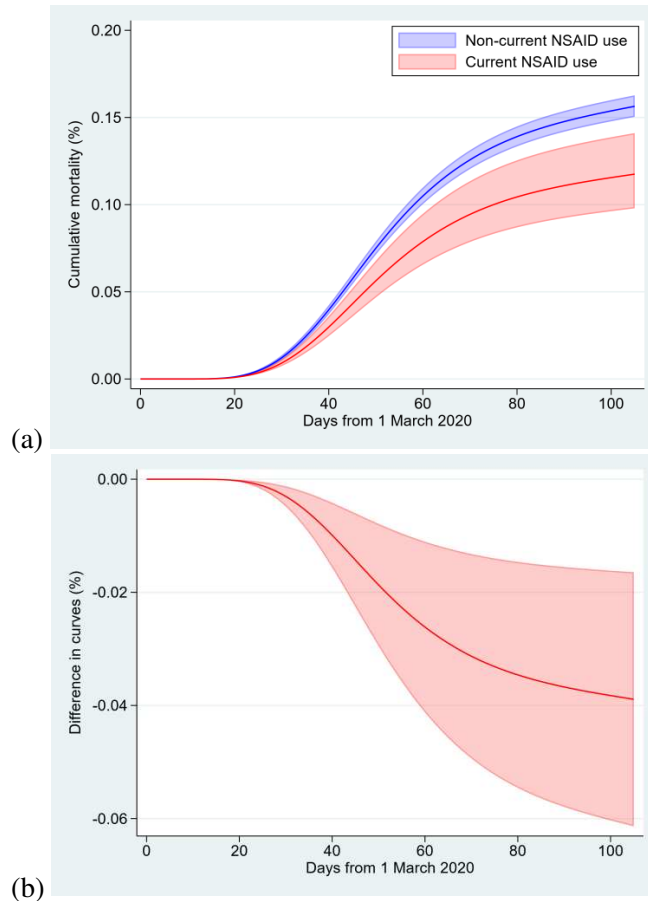

Figure S8 (a) presents cumulative mortality predicted from a Royston-Parmar model including all covariates from the Multivariable-adjusted Cox model, with the baseline hazard parametrized as a 2-degrees-of-freedom cubic spline; predictions standardized to the covariate distribution of the exposure group. Figure S8 (b) presents difference between two curves in Figure S7 (a).

**Table S4. 1 by 1 comorbidity adjustments (after age/sex adjustments and stratified by regions) – osteoarthritis/ rheumatoid arthritis population**

|                                     | HR         | 95% CI      |
|-------------------------------------|------------|-------------|
| Smoking status                      |            |             |
| non-current NSAID use               | 1.00 (ref) |             |
| current NSAID use                   | 0.86       | 0.72 - 1.03 |
|                                     |            |             |
| Index of Multiple Deprivation (IMD) |            |             |
| non-current NSAID use               | 1.00 (ref) |             |
| current NSAID use                   | 0.87       | 0.72 - 1.04 |
|                                     |            |             |
| Chronic kidney disease              |            |             |
| non-current NSAID use               | 1.00 (ref) |             |
| current NSAID use                   | 0.87       | 0.73 - 1.05 |
|                                     |            |             |
| Diagnosed hypertension              |            |             |
| non-current NSAID use               | 1.00 (ref) |             |
| current NSAID use                   | 0.87       | 0.72 - 1.04 |
|                                     |            |             |
| Heart Failure                       |            |             |
| non-current NSAID use               | 1.00 (ref) |             |
| current NSAID use                   | 0.88       | 0.74 - 1.06 |
|                                     |            |             |
| Other Heart Diseases                |            |             |
| non-current NSAID use               | 1.00 (ref) |             |
| current NSAID use                   | 0.87       | 0.73 - 1.05 |
|                                     |            |             |
| COPD                                |            |             |
| non-current NSAID use               | 1.00 (ref) |             |
| current NSAID use                   | 0.87       | 0.73 - 1.05 |
|                                     |            |             |
| Other Respiratory Diseases          |            |             |
| non-current NSAID use               | 1.00 (ref) |             |
| current NSAID use                   | 0.87       | 0.73 - 1.05 |
|                                     |            |             |
| Immunosuppressed                    |            |             |
| non-current NSAID use               | 1.00 (ref) |             |
| current NSAID use                   | 0.87       | 0.72 - 1.04 |
|                                     |            |             |
| Cancer                              |            |             |

|                                          |            |             |
|------------------------------------------|------------|-------------|
| non-current NSAID use                    | 1.00 (ref) |             |
| current NSAID use                        | 0.87       | 0.72 - 1.04 |
|                                          |            |             |
| Rheumatoid arthritis/osteoarthritis/both |            |             |
| non-current NSAID use                    | 1.00 (ref) |             |
| current NSAID use                        | 0.84       | 0.70 - 1.01 |
|                                          |            |             |
| Recent Statin                            |            |             |
| non-current NSAID use                    | 1.00 (ref) |             |
| current NSAID use                        | 0.87       | 0.72 - 1.04 |
|                                          |            |             |
| Recent PPIs                              |            |             |
| non-current NSAID use                    | 1.00 (ref) |             |
| current NSAID use                        | 0.71       | 0.59 - 0.86 |
|                                          |            |             |
| Recent oral prednisolone                 |            |             |
| non-current NSAID use                    | 1.00 (ref) |             |
| current NSAID use                        | 0.86       | 0.72 - 1.03 |
|                                          |            |             |
| Recent hydroxychloroquine                |            |             |
| non-current NSAID use                    | 1.00 (ref) |             |
| current NSAID use                        | 0.86       | 0.71 - 1.03 |
|                                          |            |             |
| Recent Other DMARDs use                  |            |             |
| non-current NSAID use                    | 1.00 (ref) |             |
| current NSAID use                        | 0.85       | 0.71 - 1.02 |
|                                          |            |             |
| Flu vaccine                              |            |             |
| non-current NSAID use                    | 1.00 (ref) |             |
| current NSAID use                        | 0.86       | 0.72 - 1.04 |
|                                          |            |             |
| Pneumococcal Vaccine                     |            |             |
| non-current NSAID use                    | 1.00 (ref) |             |
| current NSAID use                        | 0.86       | 0.72 - 1.04 |
|                                          |            |             |
| Diabetes Severity                        |            |             |
| non-current NSAID use                    | 1.00 (ref) |             |
| current NSAID use                        | 0.88       | 0.73 - 1.06 |
|                                          |            |             |
| GP consultation in last year (binary)    |            |             |
| non-current NSAID use                    | 1.00 (ref) |             |



|                                           |            |             |
|-------------------------------------------|------------|-------------|
| current NSAID use                         | 0.88       | 0.73 - 1.05 |
|                                           |            |             |
| A&E attendance rate in last year (binary) |            |             |
| non-current NSAID use                     | 1.00 (ref) |             |
| current NSAID use                         | 0.86       | 0.71 - 1.03 |

**Figure S9. Schoenfeld residuals – osteoarthritis/ rheumatoid arthritis population**

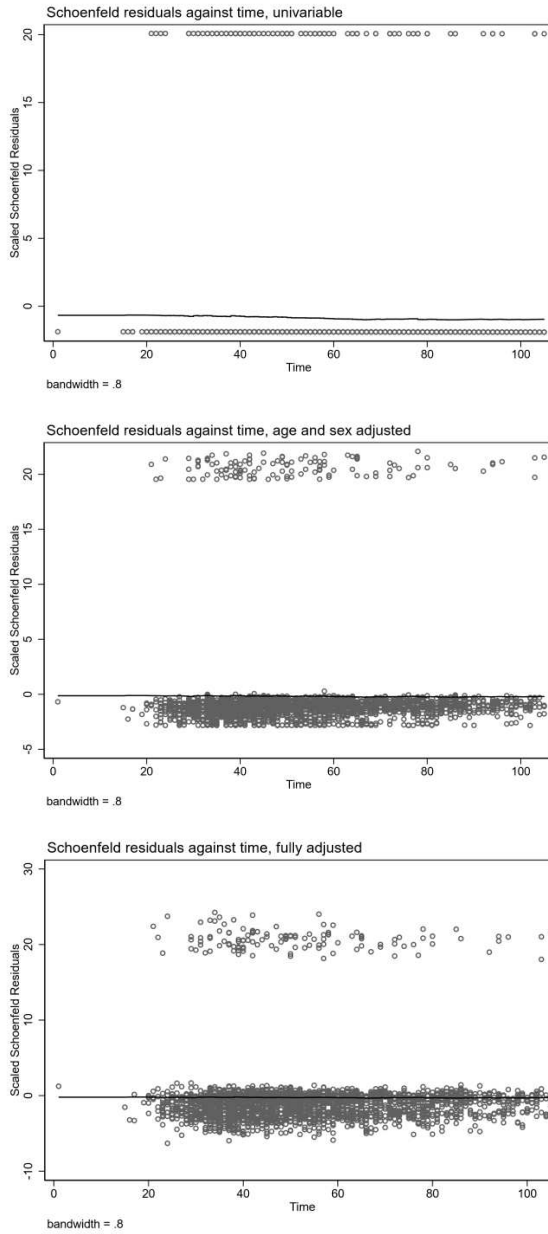

**Table S5. Descriptive Characteristics in people prescribed NSAIDs in the past 3 years, stratified by naproxen dose**

|                                            | Non-use of NSAIDs | Current use of naproxen low dose | Current use of naproxen high dose | Current use of other NSAIDs |
|--------------------------------------------|-------------------|----------------------------------|-----------------------------------|-----------------------------|
| <b>Total</b>                               | 1,927,284         | 109,656                          | 292,365                           | 134,402                     |
| <b>Age as of 1<sup>st</sup> March 2020</b> |                   |                                  |                                   |                             |
| 18-<40                                     | 598,513 (31.1)    | 23,522 (21.5)                    | 69,802 (23.9)                     | 22,534 (16.8)               |
| 40-<50                                     | 397,201 (20.6)    | 19,265 (17.6)                    | 62,733 (21.5)                     | 21,078 (15.7)               |
| 50-<60                                     | 423,937 (22.0)    | 25,271 (23.0)                    | 78,164 (26.7)                     | 29,631 (22.0)               |
| 60-<70                                     | 283,639 (14.7)    | 22,527 (20.5)                    | 53,639 (18.3)                     | 30,039 (22.4)               |
| 70-<80                                     | 169,281 (8.8)     | 14,762 (13.5)                    | 23,904 (8.2)                      | 23,555 (17.5)               |
| 80+                                        | 54,713 (2.8)      | 4,309 (3.9)                      | 4,123 (1.4)                       | 7,565 (5.6)                 |
| <b>Sex</b>                                 |                   |                                  |                                   |                             |
| Female                                     | 1,093,581 (56.7)  | 68,877 (62.8)                    | 162,181 (55.5)                    | 86,283 (64.2)               |
| <b>Body mass index</b>                     |                   |                                  |                                   |                             |
| <18.5                                      | 26,435 (1.4)      | 1,398 (1.3)                      | 2,756 (0.9)                       | 1,887 (1.4)                 |
| 18.5-24.9                                  | 484,862 (25.2)    | 24,845 (22.7)                    | 60,379 (20.7)                     | 29,433 (21.9)               |
| 25-29.9                                    | 577,087 (29.9)    | 33,230 (30.3)                    | 86,684 (29.6)                     | 39,659 (29.5)               |
| 30-34.9                                    | 333,254 (17.3)    | 21,537 (19.6)                    | 57,949 (19.8)                     | 26,828 (20.0)               |
| 35-39.9                                    | 138,059 (7.2)     | 9,848 (9.0)                      | 27,377 (9.4)                      | 13,181 (9.8)                |
| 40+                                        | 71,503 (3.7)      | 5,773 (5.3)                      | 16,771 (5.7)                      | 7,894 (5.9)                 |
| Missing                                    | 296,084 (15.4)    | 13,025 (11.9)                    | 40,449 (13.8)                     | 15,520 (11.5)               |
| <b>Ethnicity</b>                           |                   |                                  |                                   |                             |
| White                                      | 1,236,854 (64.2)  | 72,279 (65.9)                    | 195,500 (66.9)                    | 89,872 (66.9)               |
| Mixed                                      | 20,556 (1.1)      | 1,005 (0.9)                      | 2,726 (0.9)                       | 965 (0.7)                   |
| Asian or Asian British                     | 151,533 (7.9)     | 8,711 (7.9)                      | 17,431 (6.0)                      | 6,868 (5.1)                 |
| Black                                      | 49,618 (2.6)      | 2,244 (2.0)                      | 6,326 (2.2)                       | 1,957 (1.5)                 |
| Other                                      | 30,214 (1.6)      | 1,517 (1.4)                      | 3,969 (1.4)                       | 1,439 (1.1)                 |
| Missing                                    | 438,509 (22.8)    | 23,900 (21.8)                    | 66,413 (22.7)                     | 33,301 (24.8)               |
| <b>Index of Multiple Deprivation</b>       |                   |                                  |                                   |                             |
| 1 (least deprived)                         | 388,369 (20.2)    | 21,688 (19.8)                    | 57,704 (19.7)                     | 28,149 (20.9)               |
| 2                                          | 387,428 (20.1)    | 21,656 (19.7)                    | 59,074 (20.2)                     | 28,267 (21.0)               |
| 3                                          | 382,357 (19.8)    | 22,087 (20.1)                    | 57,616 (19.7)                     | 27,923 (20.8)               |
| 4                                          | 384,598 (20.0)    | 22,235 (20.3)                    | 58,381 (20.0)                     | 25,982 (19.3)               |
| 5 (most deprived)                          | 384,532 (20.0)    | 21,990 (20.1)                    | 59,590 (20.4)                     | 24,081 (17.9)               |
| <b>Smoking status</b>                      |                   |                                  |                                   |                             |
| Never                                      | 841,256 (43.6)    | 46,750 (42.6)                    | 117,900 (40.3)                    | 55,643 (41.4)               |
| Former                                     | 665,068 (34.5)    | 41,757 (38.1)                    | 110,983 (38.0)                    | 54,614 (40.6)               |
| Current                                    | 389,340 (20.2)    | 19,946 (18.2)                    | 60,430 (20.7)                     | 22,882 (17.0)               |
| Missing                                    | 31,620 (1.6)      | 1,203 (1.1)                      | 3,052 (1.0)                       | 1,263 (0.9)                 |
| <b>Comorbidities</b>                       |                   |                                  |                                   |                             |
| Hypertension                               | 353,803 (18.4)    | 27,674 (25.2)                    | 60,595 (20.7)                     | 39,809 (29.6)               |
| Heart Failure                              | 9,512 (0.5)       | 538 (0.5)                        | 1,008 (0.3)                       | 887 (0.7)                   |
| Other Heart Disease                        | 27,881 (1.4)      | 1,876 (1.7)                      | 4,166 (1.4)                       | 2,684 (2.0)                 |
| Diabetes                                   |                   |                                  |                                   |                             |
| Controlled (HbA1c <                        | 122,653 (6.4)     | 9,464 (8.6)                      | 20,436 (7.0)                      | 12,232 (9.1)                |

|                                    |                |               |                |               |
|------------------------------------|----------------|---------------|----------------|---------------|
| 58mmols/mol)                       |                |               |                |               |
| Uncontrolled (HbA1c ≥ 58mmols/mol) | 50,268 (2.6)   | 3,424 (3.1)   | 8,320 (2.8)    | 4,760 (3.5)   |
| HbA1c not measured                 | 4,536 (0.2)    | 257 (0.2)     | 680 (0.2)      | 366 (0.3)     |
| COPD                               | 42,636 (2.2)   | 3,280 (3.0)   | 7,046 (2.4)    | 5,109 (3.8)   |
| Other respiratory diseases         | 17,270 (0.9)   | 1,272 (1.2)   | 2,610 (0.9)    | 2,312 (1.7)   |
| Cancer                             | 95,315 (4.9)   | 6,759 (6.2)   | 14,261 (4.9)   | 11,108 (8.3)  |
| Immunosuppression                  | 9,285 (0.5)    | 566 (0.5)     | 1,392 (0.5)    | 960 (0.7)     |
| Chronic kidney disease             | 51,642 (2.7)   | 4,057 (3.7)   | 6,382 (2.2)    | 7,131 (5.3)   |
| Osteoarthritis                     | 367,954 (19.1) | 34,012 (31.0) | 77,224 (26.4)  | 51,440 (38.3) |
| Rheumatoid arthritis               | 28,690 (1.5)   | 3,589 (3.3)   | 8,158 (2.8)    | 9,779 (7.3)   |
| <b>GP consultations</b>            |                |               |                |               |
| Median, IQR                        | 5 (2-10)       | 8 (4-13)      | 7 (4-12)       | 8 (4-14)      |
| Min, Max                           | 0, 626         | 0, 400        | 0, 560         | 0, 576        |
| <b>A&amp;E attendance</b>          |                |               |                |               |
| Median, IQR                        | 0 (0-0)        | 0 (0-0)       | 0 (0-0)        | 0 (0-0)       |
| Min, Max                           | 0, 118         | 0, 56         | 0, 152         | 0, 67         |
| <b>Vaccination</b>                 |                |               |                |               |
| Flu                                | 435,383 (22.6) | 35,307 (32.2) | 71,987 (24.6)  | 54,788 (40.8) |
| Pneumococcal                       | 116,464 (6.0)  | 9,667 (8.8)   | 20,502 (7.0)   | 14,733 (11.0) |
| <b>Medications</b>                 |                |               |                |               |
| Statin                             | 223,221 (11.6) | 19,455 (17.7) | 40,088 (13.7)  | 27,626 (20.6) |
| Proton pump inhibitors             | 268,934 (14.0) | 72,192 (65.8) | 188,428 (64.4) | 81,646 (60.7) |
| Oral prednisolone                  | 39,081 (2.0)   | 3,128 (2.9)   | 7,291 (2.5)    | 5,665 (4.2)   |
| Hydroxychloroquine                 | 8,074 (0.4)    | 1,132 (1.0)   | 2,580 (0.9)    | 2,968 (2.2)   |
| Other DMARDs                       | 20,770 (1.1)   | 2,739 (2.5)   | 6,159 (2.1)    | 7,959 (5.9)   |

Abbreviations: COPD, Chronic obstructive pulmonary disease; DMARDs, Disease-modifying antirheumatic drugs.

**Table S6. Descriptive Characteristics in people with osteoarthritis/ rheumatoid arthritis, stratified by naproxen dose**

|                                            | Non-use of NSAIDs | Current use of naproxen low dose | Current use of naproxen high dose | Current use of other NSAIDs |
|--------------------------------------------|-------------------|----------------------------------|-----------------------------------|-----------------------------|
| <b>Total</b>                               | 1,533,286         | 36,132                           | 82,305                            | 57,058                      |
| <b>Age as of 1<sup>st</sup> March 2020</b> |                   |                                  |                                   |                             |
| 18-<40                                     | 32,958 (2.1)      | 752 (2.1)                        | 2,394 (2.9)                       | 1,287 (2.3)                 |
| 40-<50                                     | 97,870 (6.4)      | 2,705 (7.5)                      | 8,929 (10.8)                      | 4,179 (7.3)                 |
| 50-<60                                     | 292,186 (19.1)    | 8,123 (22.5)                     | 25,449 (30.9)                     | 11,825 (20.7)               |
| 60-<70                                     | 416,489 (27.2)    | 11,904 (32.9)                    | 27,384 (33.3)                     | 17,659 (30.9)               |
| 70-<80                                     | 436,477 (28.5)    | 9,592 (26.5)                     | 15,312 (18.6)                     | 16,446 (28.8)               |
| 80+                                        | 257,306 (16.8)    | 3,056 (8.5)                      | 2,837 (3.4)                       | 5,662 (9.9)                 |
| <b>Sex</b>                                 |                   |                                  |                                   |                             |
| Female                                     | 951,417 (62.1)    | 23,929 (66.2)                    | 48,559 (59.0)                     | 38,038 (66.7)               |
| <b>Body mass index</b>                     |                   |                                  |                                   |                             |
| <18.5                                      | 19,616 (1.3)      | 278 (0.8)                        | 429 (0.5)                         | 553 (1.0)                   |
| 18.5-24.9                                  | 379,233 (24.7)    | 6,925 (19.2)                     | 13,463 (16.4)                     | 11,143 (19.5)               |
| 25-29.9                                    | 518,602 (33.8)    | 11,739 (32.5)                    | 25,791 (31.3)                     | 17,857 (31.3)               |
| 30-34.9                                    | 298,505 (19.5)    | 8,307 (23.0)                     | 19,540 (23.7)                     | 12,666 (22.2)               |
| 35-39.9                                    | 119,286 (7.8)     | 3,919 (10.8)                     | 9,815 (11.9)                      | 6,328 (11.1)                |
| 40+                                        | 58,801 (3.8)      | 2,296 (6.4)                      | 6,273 (7.6)                       | 3,827 (6.7)                 |
| Missing                                    | 139,243 (9.1)     | 2,668 (7.4)                      | 6,994 (8.5)                       | 4,684 (8.2)                 |
| <b>Ethnicity</b>                           |                   |                                  |                                   |                             |
| White                                      | 1,095,982 (71.5)  | 25,805 (71.4)                    | 58,884 (71.5)                     | 40,384 (70.8)               |
| Mixed                                      | 6,563 (0.4)       | 186 (0.5)                        | 430 (0.5)                         | 214 (0.4)                   |
| Asian or Asian British                     | 51,587 (3.4)      | 1,862 (5.2)                      | 3,096 (3.8)                       | 2,011 (3.5)                 |
| Black                                      | 17,645 (1.2)      | 431 (1.2)                        | 1,215 (1.5)                       | 460 (0.8)                   |
| Other                                      | 10,916 (0.7)      | 274 (0.8)                        | 603 (0.7)                         | 364 (0.6)                   |
| Missing                                    | 350,593 (22.9)    | 7,574 (21.0)                     | 18,077 (22.0)                     | 13,625 (23.9)               |
| <b>Index of Multiple Deprivation</b>       |                   |                                  |                                   |                             |
| 1 (least deprived)                         | 313,701 (20.5)    | 6,365 (17.6)                     | 13,976 (17.0)                     | 10,456 (18.3)               |
| 2                                          | 309,372 (20.2)    | 6,753 (18.7)                     | 15,239 (18.5)                     | 10,954 (19.2)               |
| 3                                          | 307,669 (20.1)    | 7,067 (19.6)                     | 15,869 (19.3)                     | 11,661 (20.4)               |
| 4                                          | 303,859 (19.8)    | 7,607 (21.1)                     | 17,210 (20.9)                     | 11,865 (20.8)               |
| 5 (most deprived)                          | 298,685 (19.5)    | 8,340 (23.1)                     | 20,011 (24.3)                     | 12,122 (21.2)               |
| <b>Smoking status</b>                      |                   |                                  |                                   |                             |
| Never                                      | 672,833 (43.9)    | 14,961 (41.4)                    | 32,448 (39.4)                     | 22,874 (40.1)               |
| Former                                     | 692,164 (45.1)    | 16,693 (46.2)                    | 37,422 (45.5)                     | 26,868 (47.1)               |
| Current                                    | 164,464 (10.7)    | 4,423 (12.2)                     | 12,263 (14.9)                     | 7,227 (12.7)                |
| Missing                                    | 3,825 (0.2)       | 55 (0.2)                         | 172 (0.2)                         | 89 (0.2)                    |
| <b>Comorbidities</b>                       |                   |                                  |                                   |                             |
| Hypertension                               | 625,247 (40.8)    | 14,412 (39.9)                    | 28,162 (34.2)                     | 23,524 (41.2)               |
| Heart Failure                              | 36,888 (2.4)      | 317 (0.9)                        | 509 (0.6)                         | 587 (1.0)                   |
| Other Heart Disease                        | 57,976 (3.8)      | 888 (2.5)                        | 1,810 (2.2)                       | 1,504 (2.6)                 |
| Diabetes                                   |                   |                                  |                                   |                             |
| Controlled (HbA1c <                        | 177,397 (11.6)    | 4,401 (12.2)                     | 8,574 (10.4)                      | 6,560 (11.5)                |

|                                    |                  |               |               |               |
|------------------------------------|------------------|---------------|---------------|---------------|
| 58mmols/mol)                       |                  |               |               |               |
| Uncontrolled (HbA1c ≥ 58mmols/mol) |                  |               |               |               |
| HbA1c not measured                 | 58,452 (3.8)     | 1,284 (3.6)   | 2,878 (3.5)   | 2,124 (3.7)   |
| COPD                               | 3,695 (0.2)      | 92 (0.3)      | 177 (0.2)     | 150 (0.3)     |
| Other respiratory diseases         | 85,858 (5.6)     | 1,826 (5.1)   | 3,453 (4.2)   | 3,094 (5.4)   |
| Cancer                             | 38,248 (2.5)     | 729 (2.0)     | 1,281 (1.6)   | 1,425 (2.5)   |
| Immunosuppression                  | 174,647 (11.4)   | 3,395 (9.4)   | 6,403 (7.8)   | 6,142 (10.8)  |
| Chronic kidney disease             | 8,498 (0.6)      | 185 (0.5)     | 415 (0.5)     | 409 (0.7)     |
| Osteoarthritis                     | 164,985 (10.8)   | 2,547 (7.0)   | 3,700 (4.5)   | 4,901 (8.6)   |
| Rheumatoid arthritis               | 1,473,833 (96.1) | 34,012 (94.1) | 77,224 (93.8) | 51,440 (90.2) |
|                                    | 95,056 (6.2)     | 3,589 (9.9)   | 8,158 (9.9)   | 9,779 (17.1)  |
| <b>GP consultations</b>            |                  |               |               |               |
| Median, IQR                        | 6 (3-11)         | 8 (5-14)      | 8 (5-14)      | 8 (5-14)      |
| Min, Max                           | 0, 468           | 0, 360        | 0, 318        | 0, 260        |
| <b>A&amp;E attendance</b>          |                  |               |               |               |
| Median, IQR                        | 0 (0-0)          | 0 (0-0)       | 0 (0-0)       | 0 (0-0)       |
| Min, Max                           | 0, 71            | 0, 26         | 0, 36         | 0, 63         |
| <b>Vaccination</b>                 |                  |               |               |               |
| Flu                                | 806,064 (52.6)   | 18,929 (52.4) | 35,280 (42.9) | 32,306 (56.6) |
| Pneumococcal                       | 193,145 (12.6)   | 5,327 (14.7)  | 10,665 (13.0) | 8,752 (15.3)  |
| <b>Medications</b>                 |                  |               |               |               |
| Statin                             | 415,120 (27.1)   | 10,504 (29.1) | 19,976 (24.3) | 16,540 (29.0) |
| Proton pump inhibitors             | 371,464 (24.2)   | 29,365 (81.3) | 65,940 (80.1) | 41,875 (73.4) |
| Oral prednisolone                  | 61,256 (4.0)     | 1,519 (4.2)   | 3,312 (4.0)   | 3,434 (6.0)   |
| Hydroxychloroquine                 | 16,783 (1.1)     | 851 (2.4)     | 1,958 (2.4)   | 2,295 (4.0)   |
| Other DMARDs                       | 48,819 (3.2)     | 2,098 (5.8)   | 4,616 (5.6)   | 6,039 (10.6)  |

Abbreviations: COPD, Chronic obstructive pulmonary disease; DMARDs, Disease-modifying antirheumatic drugs

**Table S7. Descriptive Characteristics in people prescribed NSAIDs in the past 3 years, stratified by COX-2 specific NSAIDs**

|                                            | Non-use of NSAIDs | Current use of COX-2 specific | Current use of non-specific NSAIDs |
|--------------------------------------------|-------------------|-------------------------------|------------------------------------|
| <b>Total</b>                               | 1,927,284         | 24,808                        | 511,615                            |
| <b>Age as of 1<sup>st</sup> March 2020</b> |                   |                               |                                    |
| 18-<40                                     | 598,513 (31.1)    | 3,210 (12.9)                  | 112,648 (22.0)                     |
| 40-<50                                     | 397,201 (20.6)    | 4,255 (17.2)                  | 98,821 (19.3)                      |
| 50-<60                                     | 423,937 (22.0)    | 6,612 (26.7)                  | 126,454 (24.7)                     |
| 60-<70                                     | 283,639 (14.7)    | 5,748 (23.2)                  | 100,457 (19.6)                     |
| 70-<80                                     | 169,281 (8.8)     | 3,841 (15.5)                  | 58,380 (11.4)                      |
| 80+                                        | 54,713 (2.8)      | 1,142 (4.6)                   | 14,855 (2.9)                       |
| <b>Sex</b>                                 |                   |                               |                                    |
| Female                                     | 1,093,581 (56.7)  | 15,475 (62.4)                 | 301,866 (59.0)                     |
| <b>Body mass index</b>                     |                   |                               |                                    |
| <18.5                                      | 26,435 (1.4)      | 274 (1.1)                     | 5,767 (1.1)                        |
| 18.5-24.9                                  | 484,862 (25.2)    | 5,350 (21.6)                  | 109,307 (21.4)                     |
| 25-29.9                                    | 577,087 (29.9)    | 7,615 (30.7)                  | 151,958 (29.7)                     |
| 30-34.9                                    | 333,254 (17.3)    | 5,045 (20.3)                  | 101,269 (19.8)                     |
| 35-39.9                                    | 138,059 (7.2)     | 2,536 (10.2)                  | 47,870 (9.4)                       |
| 40+                                        | 71,503 (3.7)      | 1,438 (5.8)                   | 29,000 (5.7)                       |
| Missing                                    | 296,084 (15.4)    | 2,550 (10.3)                  | 66,444 (13.0)                      |
| <b>Ethnicity</b>                           |                   |                               |                                    |
| White                                      | 1,236,854 (64.2)  | 17,283 (69.7)                 | 340,368 (66.5)                     |
| Mixed                                      | 20,556 (1.1)      | 130 (0.5)                     | 4,566 (0.9)                        |
| Asian or Asian British                     | 151,533 (7.9)     | 988 (4.0)                     | 32,022 (6.3)                       |
| Black                                      | 49,618 (2.6)      | 208 (0.8)                     | 10,319 (2.0)                       |
| Other                                      | 30,214 (1.6)      | 230 (0.9)                     | 6,695 (1.3)                        |
| Missing                                    | 438,509 (22.8)    | 5,969 (24.1)                  | 117,645 (23.0)                     |
| <b>Index of Multiple Deprivation</b>       |                   |                               |                                    |
| 1 (least deprived)                         | 388,369 (20.2)    | 5,536 (22.3)                  | 102,005 (19.9)                     |
| 2                                          | 387,428 (20.1)    | 5,636 (22.7)                  | 103,361 (20.2)                     |
| 3                                          | 382,357 (19.8)    | 5,221 (21.0)                  | 102,405 (20.0)                     |
| 4                                          | 384,598 (20.0)    | 4,528 (18.3)                  | 102,070 (20.0)                     |
| 5 (most deprived)                          | 384,532 (20.0)    | 3,887 (15.7)                  | 101,774 (19.9)                     |
| <b>Smoking status</b>                      |                   |                               |                                    |
| Never                                      | 841,256 (43.6)    | 9,803 (39.5)                  | 210,490 (41.1)                     |
| Former                                     | 665,068 (34.5)    | 10,680 (43.1)                 | 196,674 (38.4)                     |
| Current                                    | 389,340 (20.2)    | 4,225 (17.0)                  | 99,033 (19.4)                      |
| Missing                                    | 31,620 (1.6)      | 100 (0.4)                     | 5,418 (1.1)                        |
| <b>Comorbidities</b>                       |                   |                               |                                    |
| Hypertension                               | 353,803 (18.4)    | 7,530 (30.4)                  | 120,548 (23.6)                     |
| Heart Failure                              | 9,512 (0.5)       | 174 (0.7)                     | 2,259 (0.4)                        |
| Other Heart Disease                        | 27,881 (1.4)      | 502 (2.0)                     | 8,224 (1.6)                        |
| Diabetes                                   |                   |                               |                                    |

|                                          |                |               |                |
|------------------------------------------|----------------|---------------|----------------|
| Controlled<br>(HbA1c <<br>58mmols/mol)   | 122,653 (6.4)  | 2,185 (8.8)   | 39,947 (7.8)   |
| Uncontrolled<br>(HbA1c ≥<br>58mmols/mol) | 50,268 (2.6)   | 779 (3.1)     | 15,725 (3.1)   |
| HbA1c not measured                       | 4,536 (0.2)    | 72 (0.3)      | 1,231 (0.2)    |
| COPD                                     | 42,636 (2.2)   | 983 (4.0)     | 14,452 (2.8)   |
| Other respiratory diseases               | 17,270 (0.9)   | 461 (1.9)     | 5,733 (1.1)    |
| Cancer                                   | 95,315 (4.9)   | 1,837 (7.4)   | 30,291 (5.9)   |
| Immunosuppression                        | 9,285 (0.5)    | 186 (0.7)     | 2,732 (0.5)    |
| Chronic kidney disease                   | 51,642 (2.7)   | 1,477 (6.0)   | 16,093 (3.1)   |
| Osteoarthritis                           | 367,954 (19.1) | 10,737 (43.3) | 151,939 (29.7) |
| Rheumatoid arthritis                     | 28,690 (1.5)   | 3,205 (12.9)  | 18,321 (3.6)   |
| <b>GP consultations</b>                  |                |               |                |
| Median, IQR                              | 5 (2-10)       | 9 (5-15)      | 7 (4-13)       |
| Min, Max                                 | 0, 626         | 0, 565        | 0, 576         |
| <b>A&amp;E attendance</b>                |                |               |                |
| Median, IQR                              | 0 (0-0)        | 0 (0-0)       | 0 (0-0)        |
| Min, Max                                 | 0, 118         | 0, 49         | 0, 152         |
| <b>Vaccination</b>                       |                |               |                |
| Flu                                      | 435,383 (22.6) | 10,513 (42.4) | 151,569 (29.6) |
| Pneumococcal                             | 116,464 (6.0)  | 3,312 (13.4)  | 41,590 (8.1)   |
| <b>Medications</b>                       |                |               |                |
| Statin                                   | 223,221 (11.6) | 4,934 (19.9)  | 82,235 (16.1)  |
| Proton pump inhibitors                   | 268,934 (14.0) | 16,416 (66.2) | 325,850 (63.7) |
| Oral prednisolone                        | 39,081 (2.0)   | 1,494 (6.0)   | 14,590 (2.9)   |
| Hydroxychloroquine                       | 8,074 (0.4)    | 1,040 (4.2)   | 5,640 (1.1)    |
| Other DMARDs                             | 20,770 (1.1)   | 2,856 (11.5)  | 14,001 (2.7)   |

Abbreviations: COPD, Chronic obstructive pulmonary disease; DMARDs, Disease-modifying antirheumatic drugs.



**Table S8. Descriptive Characteristics in people with osteoarthritis/ rheumatoid arthritis, stratified by COX-2 specific NSAIDs**

|                                            | Non-use of NSAIDs | Current use of COX-2 specific | Current use of non-specific NSAIDs |
|--------------------------------------------|-------------------|-------------------------------|------------------------------------|
| <b>Total</b>                               | 1,533,286         | 12,559                        | 162,936                            |
| <b>Age as of 1<sup>st</sup> March 2020</b> |                   |                               |                                    |
| 18-<40                                     | 32,958 (2.1)      | 459 (3.7)                     | 3,974 (2.4)                        |
| 40-<50                                     | 97,870 (6.4)      | 1,310 (10.4)                  | 14,503 (8.9)                       |
| 50-<60                                     | 292,186 (19.1)    | 3,158 (25.1)                  | 42,239 (25.9)                      |
| 60-<70                                     | 416,489 (27.2)    | 3,818 (30.4)                  | 53,129 (32.6)                      |
| 70-<80                                     | 436,477 (28.5)    | 2,894 (23.0)                  | 38,456 (23.6)                      |
| 80+                                        | 257,306 (16.8)    | 920 (7.3)                     | 10,635 (6.5)                       |
| <b>Sex</b>                                 |                   |                               |                                    |
| Female                                     | 951,417 (62.1)    | 8,725 (69.5)                  | 101,801 (62.5)                     |
| <b>Body mass index</b>                     |                   |                               |                                    |
| <18.5                                      | 19,616 (1.3)      | 118 (0.9)                     | 1,142 (0.7)                        |
| 18.5-24.9                                  | 379,233 (24.7)    | 2,530 (20.1)                  | 29,001 (17.8)                      |
| 25-29.9                                    | 518,602 (33.8)    | 3,938 (31.4)                  | 51,449 (31.6)                      |
| 30-34.9                                    | 298,505 (19.5)    | 2,759 (22.0)                  | 37,754 (23.2)                      |
| 35-39.9                                    | 119,286 (7.8)     | 1,427 (11.4)                  | 18,635 (11.4)                      |
| 40+                                        | 58,801 (3.8)      | 853 (6.8)                     | 11,543 (7.1)                       |
| Missing                                    | 139,243 (9.1)     | 934 (7.4)                     | 13,412 (8.2)                       |
| <b>Ethnicity</b>                           |                   |                               |                                    |
| White                                      | 1,095,982 (71.5)  | 8,939 (71.2)                  | 116,134 (71.3)                     |
| Mixed                                      | 6,563 (0.4)       | 37 (0.3)                      | 793 (0.5)                          |
| Asian or Asian British                     | 51,587 (3.4)      | 434 (3.5)                     | 6,535 (4.0)                        |
| Black                                      | 17,645 (1.2)      | 99 (0.8)                      | 2,007 (1.2)                        |
| Other                                      | 10,916 (0.7)      | 99 (0.8)                      | 1,142 (0.7)                        |
| Missing                                    | 350,593 (22.9)    | 2,951 (23.5)                  | 36,325 (22.3)                      |
| <b>Index of Multiple Deprivation</b>       |                   |                               |                                    |
| 1 (least deprived)                         | 313,701 (20.5)    | 2,309 (18.4)                  | 28,488 (17.5)                      |
| 2                                          | 309,372 (20.2)    | 2,406 (19.2)                  | 30,540 (18.7)                      |
| 3                                          | 307,669 (20.1)    | 2,606 (20.8)                  | 31,991 (19.6)                      |
| 4                                          | 303,859 (19.8)    | 2,567 (20.4)                  | 34,115 (20.9)                      |
| 5 (most deprived)                          | 298,685 (19.5)    | 2,671 (21.3)                  | 37,802 (23.2)                      |
| <b>Smoking status</b>                      |                   |                               |                                    |
| Never                                      | 672,833 (43.9)    | 4,957 (39.5)                  | 65,326 (40.1)                      |
| Former                                     | 692,164 (45.1)    | 5,887 (46.9)                  | 75,096 (46.1)                      |
| Current                                    | 164,464 (10.7)    | 1,695 (13.5)                  | 22,218 (13.6)                      |
| Missing                                    | 3,825 (0.2)       | 20 (0.2)                      | 296 (0.2)                          |
| <b>Comorbidities</b>                       |                   |                               |                                    |
| Hypertension                               | 625,247 (40.8)    | 4,803 (38.2)                  | 61,295 (37.6)                      |
| Heart Failure                              | 36,888 (2.4)      | 123 (1.0)                     | 1,290 (0.8)                        |
| Other Heart Disease                        | 57,976 (3.8)      | 328 (2.6)                     | 3,874 (2.4)                        |
| Diabetes                                   |                   |                               |                                    |

|                                          |                  |               |                  |
|------------------------------------------|------------------|---------------|------------------|
| Controlled<br>(HbA1c <<br>58mmols/mol)   | 177,397 (11.6)   | 1,347 (10.7)  | 18,188 (11.2)    |
| Uncontrolled<br>(HbA1c ≥<br>58mmols/mol) | 58,452 (3.8)     | 411 (3.3)     | 5,875 (3.6)      |
| HbA1c not measured                       | 3,695 (0.2)      | 38 (0.3)      | 381 (0.2)        |
| COPD                                     | 85,858 (5.6)     | 666 (5.3)     | 7,707 (4.7)      |
| Other respiratory diseases               | 38,248 (2.5)     | 337 (2.7)     | 3,098 (1.9)      |
| Cancer                                   | 174,647 (11.4)   | 1,151 (9.2)   | 14,789 (9.1)     |
| Immunosuppression                        | 8,498 (0.6)      | 104 (0.8)     | 905 (0.6)        |
| Chronic kidney disease                   | 164,985 (10.8)   | 1,095 (8.7)   | 10,053 (6.2)     |
| Osteoarthritis                           | 1,473,833 (96.1) | 10,737 (85.5) | 151,939 (93.3)   |
| Rheumatoid arthritis                     | 95,056 (6.2)     | 3,205 (25.5)  | 18,321<br>(11.2) |
| <b>GP consultations</b>                  |                  |               |                  |
| Median, IQR                              | 6 (3-11)         | 9 (5-16)      | 8 (5-14)         |
| Min, Max                                 | 0, 468           | 0, 225        | 0, 360           |
| <b>A&amp;E attendance</b>                |                  |               |                  |
| Median, IQR                              | 0 (0-0)          | 0 (0-0)       | 0 (0-0)          |
| Min, Max                                 | 0, 71            | 0, 24         | 0, 63            |
| <b>Vaccination</b>                       |                  |               |                  |
| Flu                                      | 806,064 (52.6)   | 6,897 (54.9)  | 79,618 (48.9)    |
| Pneumococcal                             | 193,145 (12.6)   | 2,068 (16.5)  | 22,676 (13.9)    |
| <b>Medications</b>                       |                  |               |                  |
| Statin                                   | 415,120 (27.1)   | 3,240 (25.8)  | 43,780 (26.9)    |
| Proton pump inhibitors                   | 371,464 (24.2)   | 9,038 (72.0)  | 128,142 (78.6)   |
| Oral prednisolone                        | 61,256 (4.0)     | 973 (7.7)     | 7,292 (4.5)      |
| Hydroxychloroquine                       | 16,783 (1.1)     | 784 (6.2)     | 4,320 (2.7)      |
| Other DMARDs                             | 48,819 (3.2)     | 2,016 (16.1)  | 10,737 (6.6)     |

Abbreviations: COPD, Chronic obstructive pulmonary disease; DMARDs, Disease-modifying antirheumatic drugs.

**Table S9. Descriptive Characteristics in people prescribed NSAIDs in the past 3 years, stratified by ibuprofen**

|                                            | Non-use of NSAIDs | Current use of Ibuprofen | Current use of other NSAIDs |
|--------------------------------------------|-------------------|--------------------------|-----------------------------|
| <b>Total</b>                               | 1,927,284         | 50,688                   | 485,735                     |
| <b>Age as of 1<sup>st</sup> March 2020</b> |                   |                          |                             |
| 18-<40                                     | 598,513 (31.1)    | 6,635 (13.1)             | 109,223 (22.5)              |
| 40-<50                                     | 397,201 (20.6)    | 6,414 (12.7)             | 96,662 (19.9)               |
| 50-<60                                     | 423,937 (22.0)    | 10,324 (20.4)            | 122,742 (25.3)              |
| 60-<70                                     | 283,639 (14.7)    | 12,371 (24.4)            | 93,834 (19.3)               |
| 70-<80                                     | 169,281 (8.8)     | 11,006 (21.7)            | 51,215 (10.5)               |
| 80+                                        | 54,713 (2.8)      | 3,938 (7.8)              | 12,059 (2.5)                |
| <b>Sex</b>                                 |                   |                          |                             |
| Female                                     | 1,093,581 (56.7)  | 31,481 (62.1)            | 285,860 (58.9)              |
| <b>Body mass index</b>                     |                   |                          |                             |
| <18.5                                      | 26,435 (1.4)      | 780 (1.5)                | 5,261 (1.1)                 |
| 18.5-24.9                                  | 484,862 (25.2)    | 10,869 (21.4)            | 103,788 (21.4)              |
| 25-29.9                                    | 577,087 (29.9)    | 15,149 (29.9)            | 144,424 (29.7)              |
| 30-34.9                                    | 333,254 (17.3)    | 10,284 (20.3)            | 96,030 (19.8)               |
| 35-39.9                                    | 138,059 (7.2)     | 4,959 (9.8)              | 45,447 (9.4)                |
| 40+                                        | 71,503 (3.7)      | 3,006 (5.9)              | 27,432 (5.6)                |
| Missing                                    | 296,084 (15.4)    | 5,641 (11.1)             | 63,353 (13.0)               |
| <b>Ethnicity</b>                           |                   |                          |                             |
| White                                      | 1,236,854 (64.2)  | 33,752 (66.6)            | 323,899 (66.7)              |
| Mixed                                      | 20,556 (1.1)      | 364 (0.7)                | 4,332 (0.9)                 |
| Asian or Asian British                     | 151,533 (7.9)     | 2,950 (5.8)              | 30,060 (6.2)                |
| Black                                      | 49,618 (2.6)      | 832 (1.6)                | 9,695 (2.0)                 |
| Other                                      | 30,214 (1.6)      | 625 (1.2)                | 6,300 (1.3)                 |
| Missing                                    | 438,509 (22.8)    | 12,165 (24.0)            | 111,449 (22.9)              |
| <b>Index of Multiple Deprivation</b>       |                   |                          |                             |
| 1 (least deprived)                         | 388,369 (20.2)    | 9,509 (18.8)             | 98,032 (20.2)               |
| 2                                          | 387,428 (20.1)    | 9,868 (19.5)             | 99,129 (20.4)               |
| 3                                          | 382,357 (19.8)    | 10,606 (20.9)            | 97,020 (20.0)               |
| 4                                          | 384,598 (20.0)    | 10,062 (19.9)            | 96,536 (19.9)               |
| 5 (most deprived)                          | 384,532 (20.0)    | 10,643 (21.0)            | 95,018 (19.6)               |
| <b>Smoking status</b>                      |                   |                          |                             |
| Never                                      | 841,256 (43.6)    | 20,449 (40.3)            | 199,844 (41.1)              |
| Former                                     | 665,068 (34.5)    | 20,672 (40.8)            | 186,682 (38.4)              |
| Current                                    | 389,340 (20.2)    | 9,115 (18.0)             | 94,143 (19.4)               |
| Missing                                    | 31,620 (1.6)      | 452 (0.9)                | 5,066 (1.0)                 |
| <b>Comorbidities</b>                       |                   |                          |                             |
| Hypertension                               | 353,803 (18.4)    | 16,184 (31.9)            | 111,894 (23.0)              |
| Heart Failure                              | 9,512 (0.5)       | 388 (0.8)                | 2,045 (0.4)                 |
| Other Heart Disease                        | 27,881 (1.4)      | 1,104 (2.2)              | 7,622 (1.6)                 |
| Diabetes                                   |                   |                          |                             |
| Controlled (HbA1c <                        | 122,653 (6.4)     | 5,371 (10.6)             | 36,761 (7.6)                |

|                                         |                |               |                |
|-----------------------------------------|----------------|---------------|----------------|
| 58mmols/mol)                            |                |               |                |
| Uncontrolled (HbA1c $\geq$ 58mmols/mol) | 50,268 (2.6)   | 2,235 (4.4)   | 14,269 (2.9)   |
| HbA1c not measured                      | 4,536 (0.2)    | 138 (0.3)     | 1,165 (0.2)    |
| COPD                                    | 42,636 (2.2)   | 2,316 (4.6)   | 13,119 (2.7)   |
| Other respiratory diseases              | 17,270 (0.9)   | 1,028 (2.0)   | 5,166 (1.1)    |
| Cancer                                  | 95,315 (4.9)   | 5,454 (10.8)  | 26,674 (5.5)   |
| Immunosuppression                       | 9,285 (0.5)    | 416 (0.8)     | 2,502 (0.5)    |
| Chronic kidney disease                  | 51,642 (2.7)   | 2,718 (5.4)   | 14,852 (3.1)   |
| Osteoarthritis                          | 367,954 (19.1) | 20,614 (40.7) | 142,062 (29.2) |
| Rheumatoid arthritis                    | 28,690 (1.5)   | 2,185 (4.3)   | 19,341 (4.0)   |
| <b>GP consultations</b>                 |                |               |                |
| Median, IQR                             | 5 (2-10)       | 8 (4-13)      | 7 (4-13)       |
| Min, Max                                | 0, 626         | 0, 576        | 0, 565         |
| <b>A&amp;E attendance</b>               |                |               |                |
| Median, IQR                             | 0 (0-0)        | 0 (0-0)       | 0 (0-0)        |
| Min, Max                                | 0, 118         | 0, 67         | 0, 152         |
| <b>Vaccination</b>                      |                |               |                |
| Flu                                     | 435,383 (22.6) | 23,755 (46.9) | 138,327 (28.5) |
| Pneumococcal                            | 116,464 (6.0)  | 5,924 (11.7)  | 38,978 (8.0)   |
| <b>Medications</b>                      |                |               |                |
| Statin                                  | 223,221 (11.6) | 12,176 (24.0) | 74,993 (15.4)  |
| Proton pump inhibitors                  | 268,934 (14.0) | 32,965 (65.0) | 309,301 (63.7) |
| Oral prednisolone                       | 39,081 (2.0)   | 1,934 (3.8)   | 14,150 (2.9)   |
| Hydroxychloroquine                      | 8,074 (0.4)    | 613 (1.2)     | 6,067 (1.2)    |
| Other DMARDs                            | 20,770 (1.1)   | 1,565 (3.1)   | 15,292 (3.1)   |

Abbreviations: COPD, Chronic obstructive pulmonary disease; DMARDs, Disease-modifying antirheumatic drugs.

**Table S10. Descriptive Characteristics in people with osteoarthritis/ rheumatoid arthritis, stratified by ibuprofen**

|                                            | Non-use of NSAIDs | Current use of Ibuprofen | Current use of other NSAIDs |
|--------------------------------------------|-------------------|--------------------------|-----------------------------|
| <b>Total</b>                               | 1,533,286         | 21,877                   | 153,618                     |
| <b>Age as of 1<sup>st</sup> March 2020</b> |                   |                          |                             |
| 18-<40                                     | 32,958 (2.1)      | 318 (1.5)                | 4,115 (2.7)                 |
| 40-<50                                     | 97,870 (6.4)      | 1,096 (5.0)              | 14,717 (9.6)                |
| 50-<60                                     | 292,186 (19.1)    | 3,687 (16.9)             | 41,710 (27.2)               |
| 60-<70                                     | 416,489 (27.2)    | 6,744 (30.8)             | 50,203 (32.7)               |
| 70-<80                                     | 436,477 (28.5)    | 7,234 (33.1)             | 34,116 (22.2)               |
| 80+                                        | 257,306 (16.8)    | 2,798 (12.8)             | 8,757 (5.7)                 |
| <b>Sex</b>                                 |                   |                          |                             |
| Female                                     | 951,417 (62.1)    | 14,420 (65.9)            | 96,106 (62.6)               |
| <b>Body mass index</b>                     |                   |                          |                             |
| <18.5                                      | 19,616 (1.3)      | 232 (1.1)                | 1,028 (0.7)                 |
| 18.5-24.9                                  | 379,233 (24.7)    | 4,288 (19.6)             | 27,243 (17.7)               |
| 25-29.9                                    | 518,602 (33.8)    | 6,990 (32.0)             | 48,397 (31.5)               |
| 30-34.9                                    | 298,505 (19.5)    | 4,875 (22.3)             | 35,638 (23.2)               |
| 35-39.9                                    | 119,286 (7.8)     | 2,331 (10.7)             | 17,731 (11.5)               |
| 40+                                        | 58,801 (3.8)      | 1,400 (6.4)              | 10,996 (7.2)                |
| Missing                                    | 139,243 (9.1)     | 1,761 (8.0)              | 12,585 (8.2)                |
| <b>Ethnicity</b>                           |                   |                          |                             |
| White                                      | 1,095,982 (71.5)  | 15,490 (70.8)            | 109,583 (71.3)              |
| Mixed                                      | 6,563 (0.4)       | 86 (0.4)                 | 744 (0.5)                   |
| Asian or Asian British                     | 51,587 (3.4)      | 869 (4.0)                | 6,100 (4.0)                 |
| Black                                      | 17,645 (1.2)      | 182 (0.8)                | 1,924 (1.3)                 |
| Other                                      | 10,916 (0.7)      | 144 (0.7)                | 1,097 (0.7)                 |
| Missing                                    | 350,593 (22.9)    | 5,106 (23.3)             | 34,170 (22.2)               |
| <b>Index of Multiple Deprivation</b>       |                   |                          |                             |
| 1 (least deprived)                         | 313,701 (20.5)    | 3,806 (17.4)             | 26,991 (17.6)               |
| 2                                          | 309,372 (20.2)    | 4,023 (18.4)             | 28,923 (18.8)               |
| 3                                          | 307,669 (20.1)    | 4,474 (20.5)             | 30,123 (19.6)               |
| 4                                          | 303,859 (19.8)    | 4,649 (21.3)             | 32,033 (20.9)               |
| 5 (most deprived)                          | 298,685 (19.5)    | 4,925 (22.5)             | 35,548 (23.1)               |
| <b>Smoking status</b>                      |                   |                          |                             |
| Never                                      | 672,833 (43.9)    | 8,708 (39.8)             | 61,575 (40.1)               |
| Former                                     | 692,164 (45.1)    | 10,346 (47.3)            | 70,637 (46.0)               |
| Current                                    | 164,464 (10.7)    | 2,787 (12.7)             | 21,126 (13.8)               |
| Missing                                    | 3,825 (0.2)       | 36 (0.2)                 | 280 (0.2)                   |
| <b>Comorbidities</b>                       |                   |                          |                             |
| Hypertension                               | 625,247 (40.8)    | 9,193 (42.0)             | 56,905 (37.0)               |
| Heart Failure                              | 36,888 (2.4)      | 249 (1.1)                | 1,164 (0.8)                 |
| Other Heart Disease                        | 57,976 (3.8)      | 607 (2.8)                | 3,595 (2.3)                 |
| Diabetes                                   |                   |                          |                             |
| Controlled (HbA1c <                        | 177,397 (11.6)    | 2,712 (12.4)             | 16,823 (11.0)               |

|                                         |                  |               |                |
|-----------------------------------------|------------------|---------------|----------------|
| 58mmols/mol)                            |                  |               |                |
| Uncontrolled (HbA1c $\geq$ 58mmols/mol) | 58,452 (3.8)     | 920 (4.2)     | 5,366 (3.5)    |
| HbA1c not measured                      | 3,695 (0.2)      | 48 (0.2)      | 371 (0.2)      |
| COPD                                    | 85,858 (5.6)     | 1,297 (5.9)   | 7,076 (4.6)    |
| Other respiratory diseases              | 38,248 (2.5)     | 557 (2.5)     | 2,878 (1.9)    |
| Cancer                                  | 174,647 (11.4)   | 2,748 (12.6)  | 13,192 (8.6)   |
| Immunosuppression                       | 8,498 (0.6)      | 133 (0.6)     | 876 (0.6)      |
| Chronic kidney disease                  | 164,985 (10.8)   | 1,753 (8.0)   | 9,395 (6.1)    |
| Osteoarthritis                          | 1,473,833 (96.1) | 20,614 (94.2) | 142,062 (92.5) |
| Rheumatoid arthritis                    | 95,056 (6.2)     | 2,185 (10.0)  | 19,341 (12.6)  |
| <b>GP consultations</b>                 |                  |               |                |
| Median, IQR                             | 6 (3-11)         | 8 (5-14)      | 8 (5-14)       |
| Min, Max                                | 0, 468           | 0, 260        | 0, 360         |
| <b>A&amp;E attendance</b>               |                  |               |                |
| Median, IQR                             | 0 (0-0)          | 0 (0-0)       | 0 (0-0)        |
| Min, Max                                | 0, 71            | 0, 63         | 0, 36          |
| <b>Vaccination</b>                      |                  |               |                |
| Flu                                     | 806,064 (52.6)   | 13,116 (60.0) | 73,399 (47.8)  |
| Pneumococcal                            | 193,145 (12.6)   | 3,337 (15.3)  | 21,407 (13.9)  |
| <b>Medications</b>                      |                  |               |                |
| Statin                                  | 415,120 (27.1)   | 6,860 (31.4)  | 40,160 (26.1)  |
| Proton pump inhibitors                  | 371,464 (24.2)   | 16,363 (74.8) | 120,817 (78.6) |
| Oral prednisolone                       | 61,256 (4.0)     | 1,105 (5.1)   | 7,160 (4.7)    |
| Hydroxychloroquine                      | 16,783 (1.1)     | 474 (2.2)     | 4,630 (3.0)    |
| Other DMARDs                            | 48,819 (3.2)     | 1,221 (5.6)   | 11,532 (7.5)   |

Abbreviations: COPD, Chronic obstructive pulmonary disease; DMARDs, Disease-modifying antirheumatic drugs.

**Figure S10. Time to COVID-19 related death by types of NSAIDs in Kaplan-Meier plot – General population**

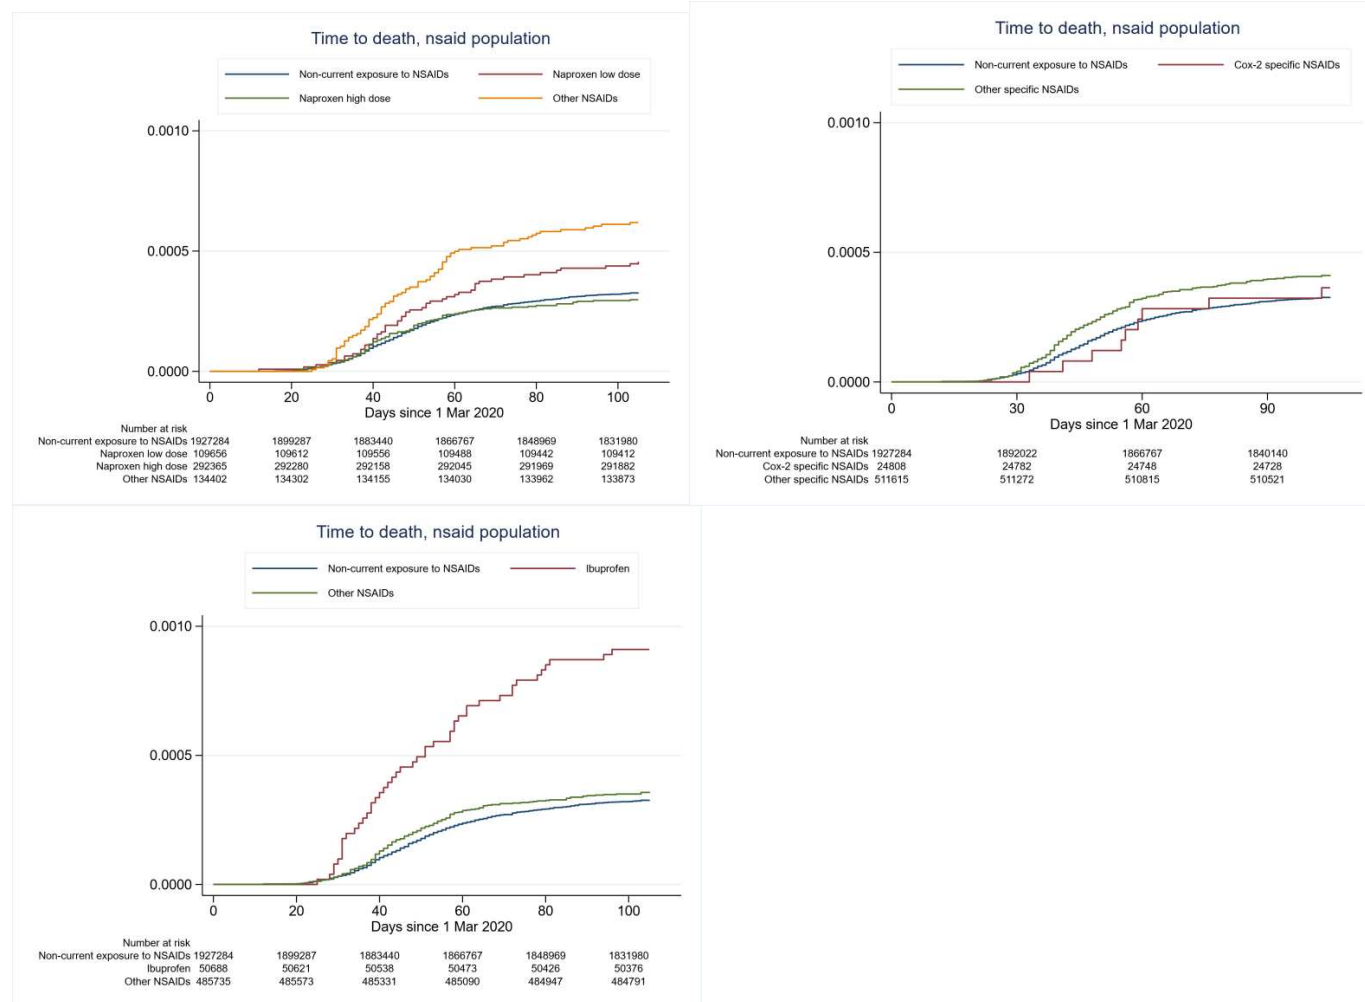

**Figure S11. Time to COVID-19 related death by types of NSAIDs in Kaplan-Meier plot – osteoarthritis/ rheumatoid arthritis population**

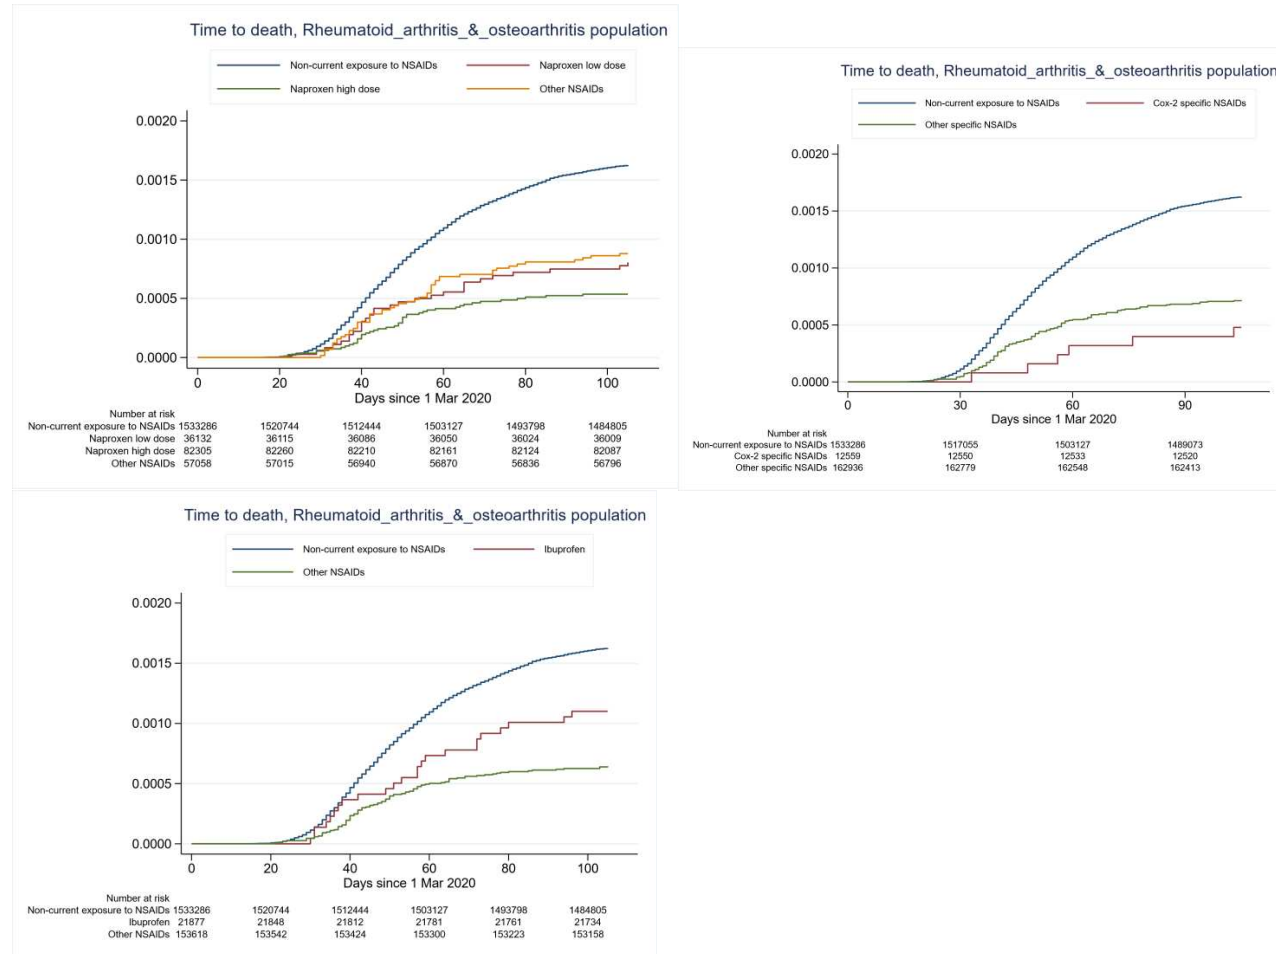



**Table S11. Association between low dose naproxen, high dose naproxen and other NSAIDs and COVID-19 compared with non-use of NSAIDs**

|                                                                          | Number of deaths | Total person-week | Rate per 1000 | Unadjusted |             | Age/Sex Adjusted |             | Multivariable-adjusted <sup>a</sup> |             |
|--------------------------------------------------------------------------|------------------|-------------------|---------------|------------|-------------|------------------|-------------|-------------------------------------|-------------|
|                                                                          |                  |                   |               | HR         | 95% CI      | HR               | 95% CI      | HR                                  | 95% CI      |
| <b>Study population 1: General population (NSAIDs prescribed cohort)</b> |                  |                   |               |            |             |                  |             |                                     |             |
| <b>Non-use of NSAID</b>                                                  | 612              | 28,098,800        | 0.02          | 1.00 (ref) |             | 1.00 (ref)       |             | 1.00 (ref)                          |             |
| <b>Low dose naproxen</b>                                                 | 50               | 1,642,787         | 0.03          | 1.4        | 1.05 - 1.87 | 1.08             | 0.81 - 1.44 | 0.93                                | 0.69 - 1.25 |
| <b>High dose naproxen</b>                                                | 87               | 4,381,525         | 0.02          | 0.91       | 0.73 - 1.14 | 1.05             | 0.84 - 1.32 | 0.92                                | 0.72 - 1.17 |
| <b>Other NSAIDs</b>                                                      | 83               | 2,011,570         | 0.04          | 1.9        | 1.51 - 2.38 | 1.15             | 0.91 - 1.44 | 1.01                                | 0.80 - 1.29 |
| <b>Study population 2: Rheumatoid arthritis/ osteoarthritis cohort</b>   |                  |                   |               |            |             |                  |             |                                     |             |
| <b>Non-use of NSAID</b>                                                  | 2450             | 22,598,389        | 0.11          | 1.00 (ref) |             | 1.00 (ref)       |             | 1.00 (ref)                          |             |
| <b>Low dose naproxen</b>                                                 | 29               | 540,985           | 0.05          | 0.49       | 0.34 - 0.71 | 0.83             | 0.58 - 1.20 | 0.77                                | 0.53 - 1.11 |
| <b>High dose naproxen</b>                                                | 44               | 1,232,759         | 0.04          | 0.33       | 0.24 - 0.44 | 0.85             | 0.63 - 1.15 | 0.79                                | 0.58 - 1.07 |
| <b>Other NSAIDs</b>                                                      | 50               | 853,672           | 0.06          | 0.54       | 0.41 - 0.71 | 0.81             | 0.62 - 1.08 | 0.77                                | 0.58 - 1.02 |

<sup>a</sup>Adjusted for age, sex, obesity, smoking status, deprivation, chronic kidney disease, hypertension, heart failure, other heart diseases, diabetes severity, chronic obstructive pulmonary disease, other respiratory diseases, immunosuppression, cancer, rheumatoid arthritis (study population 1), osteoarthritis (study population 1), rheumatoid arthritis/osteoarthritis/both (study population 2), statins, proton pump inhibitors, oral prednisolone, hydroxychloroquine, other DMARDS, flu vaccine and pneumococcal vaccine.

**Table S12. Association between COX-2 specific NSAIDs, non-specific NSAIDs with COVID-19 death compared with non-use of NSAIDs**

|                                                                          | Number of deaths | Total person-week | Rate per 1000 | Unadjusted |             | Age/Sex Adjusted |             | Multivariable-adjusted <sup>a</sup> |             |
|--------------------------------------------------------------------------|------------------|-------------------|---------------|------------|-------------|------------------|-------------|-------------------------------------|-------------|
|                                                                          |                  |                   |               | HR         | 95% CI      | HR               | 95% CI      | HR                                  | 95% CI      |
| <b>Study population 1: General population (NSAIDs prescribed cohort)</b> |                  |                   |               |            |             |                  |             |                                     |             |
| Non-use of NSAID                                                         | 612              | 28,098,800        | 0.02          | 1.00 (ref) |             | 1.00 (ref)       |             | 1.00 (ref)                          |             |
| COX-2 specific NSAIDs                                                    | 9                | 371,411           | 0.02          | 1.11       | 0.58 - 2.15 | 0.77             | 0.40 - 1.48 | 0.61                                | 0.31 - 1.18 |
| Non-specific NSAIDs                                                      | 211              | 7,664,471         | 0.03          | 1.26       | 1.08 - 1.48 | 1.11             | 0.95 - 1.30 | 0.98                                | 0.82 - 1.17 |
| <b>Study population 2: Rheumatoid arthritis/ osteoarthritis cohort</b>   |                  |                   |               |            |             |                  |             |                                     |             |
| Non-use of NSAID                                                         | 2450             | 22,598,389        | 0.11          | 1.00 (ref) |             | 1.00 (ref)       |             | 1.00 (ref)                          |             |
| COX-2 specific NSAIDs                                                    | 6                | 188,073           | 0.03          | 0.29       | 0.13 - 0.66 | 0.56             | 0.25 - 1.26 | 0.48                                | 0.22 - 1.08 |
| Non-specific NSAIDs                                                      | 117              | 2,439,343         | 0.05          | 0.44       | 0.37 - 0.53 | 0.85             | 0.71 - 1.03 | 0.80                                | 0.66 - 0.97 |

<sup>a</sup>Adjusted for age, sex, obesity, smoking status, deprivation, chronic kidney disease, hypertension, heart failure, other heart diseases, diabetes severity, chronic obstructive pulmonary disease, other respiratory diseases, immunosuppression, cancer, rheumatoid arthritis (study population 1), osteoarthritis (study population 1), rheumatoid arthritis/osteoarthritis/both (study population 2), statins, proton pump inhibitors, oral prednisolone, hydroxychloroquine, other DMARDS, flu vaccine and pneumococcal vaccine.

**Table S13. Association between ibuprofen, other NSAIDs with COVID-19 death compared with non-use of NSAIDs**

|                                                                          | Number of deaths | Total person-week | Rate per 1000 | Unadjusted |             | Age/Sex Adjusted |             | Multivariable-adjusted <sup>a</sup> |             |
|--------------------------------------------------------------------------|------------------|-------------------|---------------|------------|-------------|------------------|-------------|-------------------------------------|-------------|
|                                                                          |                  |                   |               | HR         | 95% CI      | HR               | 95% CI      | HR                                  | 95% CI      |
| <b>Study population 1: General population (NSAIDs prescribed cohort)</b> |                  |                   |               |            |             |                  |             |                                     |             |
| <b>Non-use of NSAID</b>                                                  | 612              | 28,098,800        | 0.02          | 1.00 (ref) |             | 1.00 (ref)       |             | 1.00 (ref)                          |             |
| <b>Ibuprofen</b>                                                         | 46               | 757,664           | 0.06          | 2.79       | 2.07 - 3.76 | 1.35             | 1.00 - 1.82 | 1.23                                | 0.90 - 1.68 |
| <b>Other NSAIDs</b>                                                      | 174              | 7,278,218         | 0.02          | 1.10       | 0.93 - 1.30 | 1.04             | 0.88 - 1.23 | 0.90                                | 0.75 - 1.08 |
| <b>Study population 2: Rheumatoid arthritis/ osteoarthritis cohort</b>   |                  |                   |               |            |             |                  |             |                                     |             |
| <b>Non-use of NSAID</b>                                                  | 2450             | 22,598,389        | 0.11          | 1.00 (ref) |             | 1.00 (ref)       |             | 1.00 (ref)                          |             |
| <b>Ibuprofen</b>                                                         | 24               | 326,968           | 0.07          | 0.68       | 0.45 - 1.01 | 0.85             | 0.57 - 1.27 | 0.83                                | 0.56 - 1.25 |
| <b>Other NSAIDs</b>                                                      | 99               | 2,300,448         | 0.04          | 0.40       | 0.32 - 0.49 | 0.83             | 0.68 - 1.02 | 0.76                                | 0.62 - 0.94 |

<sup>a</sup>Adjusted for age, sex, obesity, smoking status, deprivation, chronic kidney disease, hypertension, heart failure, other heart diseases, diabetes severity, chronic obstructive pulmonary disease, other respiratory diseases, immunosuppression, cancer, rheumatoid arthritis (study population 1), osteoarthritis (study population 1), rheumatoid arthritis/osteoarthritis/both (study population 2), statins, proton pump inhibitors, oral prednisolone, hydroxychloroquine, other DMARDS, flu vaccine and pneumococcal vaccine.

**Table S14. Sensitivity analysis that excluding people ever prescribed aspirin**

|                                                                          | Number of deaths | Total person-week | Rate per 1000 | Unadjusted |             | Age/Sex Adjusted HR |             | Multivariable-adjusted <sup>a</sup> |             |
|--------------------------------------------------------------------------|------------------|-------------------|---------------|------------|-------------|---------------------|-------------|-------------------------------------|-------------|
|                                                                          |                  |                   |               | HR         | 95% CI      | HR                  | 95% CI      | HR                                  | 95% CI      |
| <b>Study population 1: General population (NSAIDs prescribed cohort)</b> |                  |                   |               |            |             |                     |             |                                     |             |
| <b>Non-use of NSAID</b>                                                  | 564              | 27,457,627        | 0.02          | 1.00 (ref) |             | 1.00 (ref)          |             | 1.00 (ref)                          |             |
| <b>Current use of NSAIDs</b>                                             | 209              | 7,807,712         | 0.03          | 1.30       | 1.11 - 1.53 | 1.12                | 0.96 - 1.31 | 0.98                                | 0.82 - 1.17 |
| <b>Study population 2: Rheumatoid arthritis/ osteoarthritis cohort</b>   |                  |                   |               |            |             |                     |             |                                     |             |
| <b>Non-use of NSAID</b>                                                  | 2071             | 21,136,466        | 0.10          | 1.00 (ref) |             | 1.00 (ref)          |             | 1.00 (ref)                          |             |
| <b>Current use of NSAIDs</b>                                             | 117              | 2,502,595         | 0.05          | 0.48       | 0.40 - 0.57 | 0.90                | 0.74 - 1.09 | 0.84                                | 0.69 - 1.02 |

<sup>a</sup>Adjusted for age, sex, obesity, smoking status, deprivation, chronic kidney disease, hypertension, heart failure, other heart diseases, diabetes severity, chronic obstructive pulmonary disease, other respiratory diseases, immunosuppression, cancer, rheumatoid arthritis (study population 1), osteoarthritis (study population 1), rheumatoid arthritis/osteoarthritis/both (study population 2), statins, proton pump inhibitors, oral prednisolone, hydroxychloroquine, other DMARDS, flu vaccine, and pneumococcal vaccine.

**Table S15. Post-hoc analysis that using Directed Acyclic Graph approach to select covariates**

|                                                                          | Full cohort      |                   |               |                       |             | Complete case cohort |                   |               |                       |             |                       |             |
|--------------------------------------------------------------------------|------------------|-------------------|---------------|-----------------------|-------------|----------------------|-------------------|---------------|-----------------------|-------------|-----------------------|-------------|
|                                                                          | Number of deaths | Total person-week | Rate per 1000 | Adjusted <sup>a</sup> |             | Number of deaths     | Total person-week | Rate per 1000 | Adjusted <sup>b</sup> |             | Adjusted <sup>c</sup> |             |
|                                                                          |                  |                   |               | HR                    | 95% CI      |                      |                   |               | HR                    | 95% CI      | HR                    | 95% CI      |
| <b>Study population 1: General population (NSAIDs prescribed cohort)</b> |                  |                   |               |                       |             |                      |                   |               |                       |             |                       |             |
| <b>Non-use of NSAID</b>                                                  | 612              | 28,098,800        | 0.02          | 1.00 (ref)            |             | 464                  | 21,700,642        | 0.02          | 1.00 (ref)            |             | 1.00 (ref)            |             |
| <b>Current use of NSAIDs</b>                                             | 220              | 8,035,882         | 0.03          | 1.13                  | 0.96 - 1.32 | 167                  | 6,184,511         | 0.03          | 1.13                  | 0.95 - 1.35 | 1.14                  | 0.95 - 1.36 |
| <b>Study population 2: Rheumatoid arthritis/ osteoarthritis cohort</b>   |                  |                   |               |                       |             |                      |                   |               |                       |             |                       |             |
| <b>Non-use of NSAID</b>                                                  | 2450             | 22,598,389        | 0.11          | 1.00 (ref)            |             | 1817                 | 17,430,871        | 0.10          | 1.00 (ref)            |             | 1.00 (ref)            |             |
| <b>Current use of NSAIDs</b>                                             | 123              | 2,627,417         | 0.05          | 0.86                  | 0.71 - 1.03 | 86                   | 2,039,674         | 0.04          | 0.80                  | 0.64 - 0.99 | 0.79                  | 0.64 - 0.99 |

<sup>a</sup>Included all covariates selected using DAG approach except ethnicity in full cohort. Adjusted for age, sex, obesity, smoking status, deprivation, chronic kidney disease, hypertension, heart failure, other heart diseases, diabetes severity, chronic obstructive pulmonary disease, other respiratory diseases, immunosuppression, cancer, rheumatoid arthritis (study population 1), osteoarthritis (study population 1), rheumatoid arthritis/osteoarthritis/both (study population 2), oral prednisolone, hydroxychloroquine, other DMARDS, and A&E attendance.

<sup>b</sup>Included all covariates selected using DAG approach except ethnicity in complete case cohort. Adjusted for age, sex, obesity, smoking status, deprivation, chronic kidney disease, hypertension, heart failure, other heart diseases, diabetes severity, chronic obstructive pulmonary disease, other respiratory diseases, immunosuppression, cancer, rheumatoid arthritis (study population 1), osteoarthritis (study population 1), rheumatoid arthritis/osteoarthritis/both (study population 2), oral prednisolone, hydroxychloroquine, other DMARDS, ethnicity and A&E attendance.

<sup>c</sup>Included all covariates selected using DAG approach in complete case cohort. Adjusted for age, sex, obesity, smoking status, deprivation, chronic kidney disease, hypertension, heart failure, other heart diseases, diabetes severity, chronic obstructive pulmonary disease, other respiratory diseases, immunosuppression, cancer, rheumatoid arthritis (study population 1), osteoarthritis (study population 1), rheumatoid arthritis/osteoarthritis/both (study population 2), oral prednisolone, hydroxychloroquine, other DMARDS, ethnicity and A&E attendance.

**Table S16. Sensitivity analysis that additionally adjusting for ethnicity in the Multivariable-adjusted models**

|                                                                          | Number of deaths | Total person-week | Rate per 1000 | Unadjusted |             | Age/Sex Adjusted |             | Multivariable-adjusted <sup>a</sup> |             |
|--------------------------------------------------------------------------|------------------|-------------------|---------------|------------|-------------|------------------|-------------|-------------------------------------|-------------|
|                                                                          |                  |                   |               | HR         | 95% CI      | HR               | 95% CI      | HR                                  | 95% CI      |
| <b>Study population 1: General population (NSAIDs prescribed cohort)</b> |                  |                   |               |            |             |                  |             |                                     |             |
| <b>Non-use of NSAID</b>                                                  | 464              | 2,170,0642        | 0.02          | 1.00 (ref) |             | 1.00 (ref)       |             | 1.00 (ref)                          |             |
| <b>Current use of NSAIDs</b>                                             | 167              | 6,184,511         | 0.03          | 1.26       | 1.06 - 1.51 | 1.10             | 0.92 - 1.31 | 1.01                                | 0.83 - 1.24 |
| <b>Study population 2: Rheumatoid arthritis/ osteoarthritis cohort</b>   |                  |                   |               |            |             |                  |             |                                     |             |
| <b>Non-use of NSAID</b>                                                  | 1817             | 17,430,871        | 0.1           | 1.00 (ref) |             | 1.00 (ref)       |             | 1.00 (ref)                          |             |
| <b>Current use of NSAIDs</b>                                             | 86               | 2,039,674         | 0.04          | 0.40       | 0.33 - 0.50 | 0.78             | 0.63 - 0.97 | 0.73                                | 0.58 - 0.91 |

<sup>a</sup>Adjusted for age, sex, obesity, smoking status, deprivation, chronic kidney disease, hypertension, heart failure, other heart diseases, diabetes severity, chronic obstructive pulmonary disease, other respiratory diseases, immunosuppression, cancer, rheumatoid arthritis, osteoarthritis (study population 1), osteoarthritis (study population 1), rheumatoid arthritis/osteoarthritis/both (study population 2), statins, proton pump inhibitors, oral prednisolone, hydroxychloroquine, other DMARDS, flu vaccine, pneumococcal vaccine and ethnicity. Complete case analysis was conducted for addressing missing data.

**Table S17. Sensitivity analysis that additionally adjusted for GP consultation and A&E attendance in the Multivariable-adjusted models**

|                                                                          | Number of deaths | Total person-week | Rate per 1000 | Unadjusted |             | Age/Sex Adjusted |             | Multivariable-adjusted <sup>a</sup> |             |
|--------------------------------------------------------------------------|------------------|-------------------|---------------|------------|-------------|------------------|-------------|-------------------------------------|-------------|
|                                                                          |                  |                   |               | HR         | 95% CI      | HR               | 95% CI      | HR                                  | 95% CI      |
| <b>Study population 1: General population (NSAIDs prescribed cohort)</b> |                  |                   |               |            |             |                  |             |                                     |             |
| Non-use of NSAID                                                         | 612              | 28,098,800        | 0.02          | 1.00 (ref) |             | 1.00 (ref)       |             | 1.00 (ref)                          |             |
| Current use of NSAIDs                                                    | 220              | 8,035,882         | 0.03          | 1.26       | 1.08 - 1.47 | 1.09             | 0.94 - 1.28 | 0.98                                | 0.83 - 1.17 |
| <b>Study population 2: Rheumatoid arthritis/ osteoarthritis cohort</b>   |                  |                   |               |            |             |                  |             |                                     |             |
| Non-use of NSAID                                                         | 2450             | 22,598,389        | 0.11          | 1.00 (ref) |             | 1.00 (ref)       |             | 1.00 (ref)                          |             |
| Current use of NSAIDs                                                    | 123              | 2,627,417         | 0.05          | 0.43       | 0.36 - 0.52 | 0.83             | 0.69 - 1.00 | 0.80                                | 0.67 - 0.97 |

<sup>a</sup>Adjusted for age, sex, obesity, smoking status, deprivation, chronic kidney disease, hypertension, heart failure, other heart diseases, diabetes severity, chronic obstructive pulmonary disease, other respiratory diseases, immunosuppression, cancer, rheumatoid arthritis, osteoarthritis (study population 1), osteoarthritis (study population 1), rheumatoid arthritis/osteoarthritis/both (study population 2), statins, proton pump inhibitors, oral prednisolone, hydroxychloroquine, other DMARDS, flu vaccine, pneumococcal vaccine, and GP consultations and A&E attendances in the past year.

**Table S18. Sensitivity analysis that separating HbA1c no measures category from uncontrolled diabetes category in the Multivariable-adjusted models**

|                                                                          | Number of deaths | Total person-week | Rate per 1000 | Multivariable-adjusted <sup>a</sup><br>(Main analysis) |             | Multivariable-adjusted <sup>b</sup><br>(separating HbA1c no measures category from uncontrolled diabetes category) |             |
|--------------------------------------------------------------------------|------------------|-------------------|---------------|--------------------------------------------------------|-------------|--------------------------------------------------------------------------------------------------------------------|-------------|
|                                                                          |                  |                   |               | HR                                                     | 95% CI      | HR                                                                                                                 | 95% CI      |
| <b>Study population 1: General population (NSAIDs prescribed cohort)</b> |                  |                   |               |                                                        |             |                                                                                                                    |             |
| Non-use of NSAID                                                         | 612              | 28,098,800        | 0.02          | 1.00 (ref)                                             |             | 1.00 (ref)                                                                                                         |             |
| Current use of NSAIDs                                                    | 220              | 8,035,882         | 0.03          | 0.96                                                   | 0.80 - 1.14 | 0.96                                                                                                               | 0.81 - 1.14 |
| <b>Study population 2: Rheumatoid arthritis/ osteoarthritis cohort</b>   |                  |                   |               |                                                        |             |                                                                                                                    |             |
| Non-use of NSAID                                                         | 2450             | 22,598,389        | 0.11          | 1.00 (ref)                                             |             | 1.00 (ref)                                                                                                         |             |
| Current use of NSAIDs                                                    | 123              | 2,627,417         | 0.05          | 0.78                                                   | 0.64 - 0.94 | 0.78                                                                                                               | 0.64 - 0.94 |

<sup>a</sup>Adjusted for age, sex, obesity, smoking status, deprivation, chronic kidney disease, hypertension, heart failure, other heart diseases, diabetes severity (three categories: no diabetes, controlled diabetes, uncontrolled diabetes), chronic obstructive pulmonary disease, other respiratory diseases, immunosuppression, cancer, rheumatoid arthritis (study population 1), osteoarthritis (study population 1), rheumatoid arthritis/osteoarthritis/both (study population 2), statins, proton pump inhibitors, oral prednisolone, hydroxychloroquine, other DMARDS, flu vaccine and pneumococcal vaccine.

<sup>b</sup>Adjusted for age, sex, obesity, smoking status, deprivation, chronic kidney disease, hypertension, heart failure, other heart diseases, diabetes severity (four categories: no diabetes, controlled diabetes, uncontrolled diabetes, diabetes without HbA1c measures), chronic obstructive pulmonary disease, other respiratory diseases, immunosuppression, cancer, rheumatoid arthritis (study population 1), osteoarthritis (study population 1), rheumatoid arthritis/osteoarthritis/both (study population 2), statins, proton pump inhibitors, oral prednisolone, hydroxychloroquine, other DMARDS, flu vaccine and pneumococcal vaccine.



**Table S19. Sensitivity analysis that using 2 months to be the timeframe to identify exposure status**

|                                                                          | Number of deaths | Total person-week | Rate per 1000 | Unadjusted |             | Age/Sex Adjusted |             | Multivariable-adjusted <sup>a</sup> |             |
|--------------------------------------------------------------------------|------------------|-------------------|---------------|------------|-------------|------------------|-------------|-------------------------------------|-------------|
|                                                                          |                  |                   |               | HR         | 95% CI      | HR               | 95% CI      | HR                                  | 95% CI      |
| <b>Study population 1: General population (NSAIDs prescribed cohort)</b> |                  |                   |               |            |             |                  |             |                                     |             |
| <b>Non-use of NSAID</b>                                                  | 666              | 30,694,208        | 0.02          | 1.00 (ref) |             | 1.00 (ref)       |             | 1.00 (ref)                          |             |
| <b>Current use of NSAIDs</b>                                             | 166              | 5,440,475         | 0.03          | 1.41       | 1.19 - 1.67 | 1.16             | 0.98 - 1.37 | 1.03                                | 0.86 - 1.24 |
| <b>Study population 2: Rheumatoid arthritis/ osteoarthritis cohort</b>   |                  |                   |               |            |             |                  |             |                                     |             |
| <b>Non-use of NSAID</b>                                                  | 2484             | 23,264,091        | 0.11          | 1.00 (ref) |             | 1.00 (ref)       |             | 1.00 (ref)                          |             |
| <b>Current use of NSAIDs</b>                                             | 89               | 1,961,714         | 0.05          | 0.42       | 0.34 - 0.52 | 0.81             | 0.66 - 1.01 | 0.75                                | 0.61 - 0.94 |

<sup>a</sup>Adjusted for age, sex, obesity, smoking status, deprivation, chronic kidney disease, hypertension, heart failure, other heart diseases, diabetes severity, chronic obstructive pulmonary disease, other respiratory diseases, immunosuppression, cancer, rheumatoid arthritis (study population 1), osteoarthritis (study population 1), rheumatoid arthritis/osteoarthritis/both (study population 2), statins, proton pump inhibitors, oral prednisolone, hydroxychloroquine, other DMARDS, flu vaccine, and pneumococcal vaccine.

**Table S20. Sensitivity analysis that removing indomethacin from exposure of interest**

|                                                                          | Number of deaths | Total person-week | Rate per 1000 | Unadjusted |             | Age/Sex Adjusted |             | Multivariable-adjusted <sup>a</sup> |             |
|--------------------------------------------------------------------------|------------------|-------------------|---------------|------------|-------------|------------------|-------------|-------------------------------------|-------------|
|                                                                          |                  |                   |               | HR         | 95% CI      | HR               | 95% CI      | HR                                  | 95% CI      |
| <b>Study population 1: General population (NSAIDs prescribed cohort)</b> |                  |                   |               |            |             |                  |             |                                     |             |
| <b>Non-use of NSAID</b>                                                  | 612              | 28,098,800        | 0.02          | 1.00 (ref) |             | 1.00 (ref)       |             | 1.00 (ref)                          |             |
| <b>Current use of NSAIDs</b>                                             | 217              | 7,958,682         | 0.03          | 1.25       | 1.07 - 1.46 | 1.09             | 0.94 - 1.28 | 0.96                                | 0.81 - 1.14 |
| <b>Study population 2: Rheumatoid arthritis/ osteoarthritis cohort</b>   |                  |                   |               |            |             |                  |             |                                     |             |
| <b>Non-use of NSAID</b>                                                  | 2450             | 22,598,389        | 0.11          | 1.00 (ref) |             | 1.00 (ref)       |             | 1.00 (ref)                          |             |
| <b>Current use of NSAIDs</b>                                             | 122              | 2,604,091         | 0.05          | 0.43       | 0.36 - 0.52 | 0.83             | 0.69 - 1.00 | 0.78                                | 0.65 - 0.94 |

<sup>a</sup>Adjusted for age, sex, obesity, smoking status, deprivation, chronic kidney disease, hypertension, heart failure, other heart diseases, diabetes severity, chronic obstructive pulmonary disease, other respiratory diseases, immunosuppression, cancer, rheumatoid arthritis (study population 1), osteoarthritis (study population 1), rheumatoid arthritis/osteoarthritis/both (study population 2), statins, proton pump inhibitors, oral prednisolone, hydroxychloroquine, other DMARDS, flu vaccine, and pneumococcal vaccine.

**Table S21. Sensitivity analysis that not censoring people at NSAID prescription after study start date in the non-use of NSAID group as an intention-to-treat analysis**

|                                                                          | Number of deaths | Total person-week | Rate per 1000 | Unadjusted |             | Age/Sex Adjusted |             | Multivariable-adjusted <sup>a</sup> |             |
|--------------------------------------------------------------------------|------------------|-------------------|---------------|------------|-------------|------------------|-------------|-------------------------------------|-------------|
|                                                                          |                  |                   |               | HR         | 95% CI      | HR               | 95% CI      | HR                                  | 95% CI      |
| <b>Study population 1: General population (NSAIDs prescribed cohort)</b> |                  |                   |               |            |             |                  |             |                                     |             |
| <b>Non-use of NSAID</b>                                                  | 625              | 28,885,285        | 0.02          | 1.00 (ref) |             | 1.00 (ref)       |             | 1.00 (ref)                          |             |
| <b>Current use of NSAIDs</b>                                             | 220              | 8,035,882         | 0.03          | 1.27       | 1.09 - 1.48 | 1.10             | 0.94 - 1.28 | 0.96                                | 0.81 - 1.14 |
| <b>Study population 2: Rheumatoid arthritis/ osteoarthritis cohort</b>   |                  |                   |               |            |             |                  |             |                                     |             |
| <b>Non-use of NSAID</b>                                                  | 2464             | 22,916,713        | 0.11          | 1.00 (ref) |             | 1.00 (ref)       |             | 1.00 (ref)                          |             |
| <b>Current use of NSAIDs</b>                                             | 123              | 2,627,417         | 0.05          | 0.44       | 0.36 - 0.52 | 0.83             | 0.69 - 1.00 | 0.78                                | 0.64 - 0.94 |

<sup>a</sup>Adjusted for age, sex, obesity, smoking status, deprivation, chronic kidney disease, hypertension, heart failure, other heart diseases, diabetes severity, chronic obstructive pulmonary disease, other respiratory diseases, immunosuppression, cancer, rheumatoid arthritis (study population 1), osteoarthritis (study population 1), rheumatoid arthritis/osteoarthritis/both (study population 2), statins, proton pump inhibitors, oral prednisolone, hydroxychloroquine, other DMARDs, flu vaccine, and pneumococcal vaccine

**Figure S12. E-value for the upper 95% CI and point estimate in people with rheumatoid arthritis/ osteoarthritis**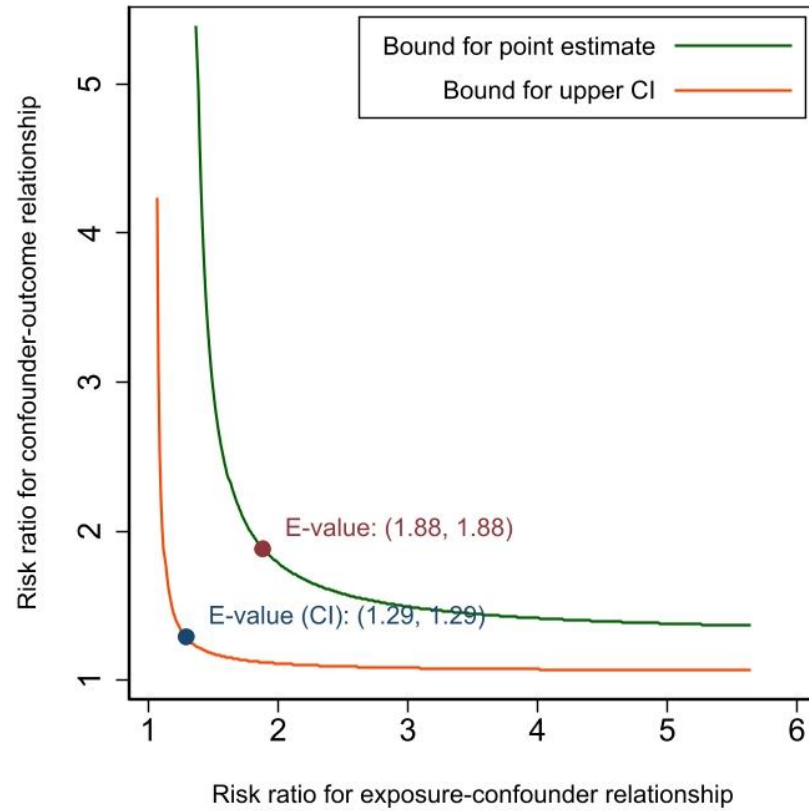

Supplement: annrheumdis-2020-219517supp001.pdf [file annrheumdis-2020-219517supp001.pdf]
